# Supplementary material for: Structural Investigations on 2-Amidobenzimidazole Derivatives as New Inhibitors of Protein Kinase CK1 Delta
Source: MDPI journal article supplement (doi:10.3390/ph17040468), 2024-04-07

## Supplementary Materials

### Structural investigations on 2-amidobenzimidazole derivatives as new inhibitors of protein kinase CK1 delta

Sara Calenda, Daniela Catarzi, Flavia Varano, Erica Vigiani, Rosaria Volpini, Catia Lambertucci, Andrea Spinaci, Letizia Trevisan, Ilenia Grieco, Stephanie Federico, Giampiero Spalluto, Gianluca Novello, Veronica Salmaso, Stefano Moro, Vittoria Colotta

#### Table of Contents

- **Figure S1.** Comparison between the docking pose of the reference crystallographic ligand IWP-2 (blue) with its relative X-ray conformation (grey) within CK1 $\delta$  (orange) binding site (PDB ID: 5OKT)..... *Page S1*
- **Table S1.** Physicochemical and pharmacokinetic parameters of derivatives **15**, **18**, **22**, **23**..... *Page S2*
- **Scanned <sup>1</sup>H-NMR spectra of derivatives 1-32**..... *Page S3*

#### Figure S1

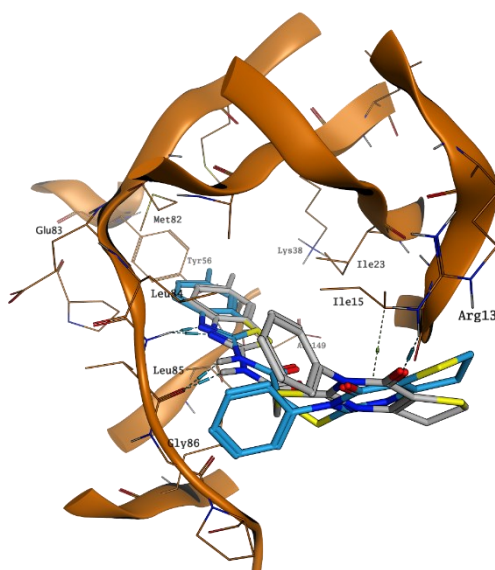

**Figure S1.** Comparison between the docking pose of the reference crystallographic ligand IWP-2 (blue) with its relative X-ray conformation (grey) within CK1 $\delta$  (orange) binding site (PDB ID: 5OKT).

**Table S1.** Physicochemical and pharmacokinetic parameters of derivatives **15**, **18**, **22**, **23**

| Compound ID               | 15     | 18     | 22     | 23     | PF-670462* |
|---------------------------|--------|--------|--------|--------|------------|
| <i>logP (o/w)</i>         | 2.814  | 1.557  | 3.160  | 1.573  | 3.882      |
| <i>logS</i>               | -4.421 | -3.776 | -4.989 | -4.631 | -5.839     |
| <i>logHERG</i>            | -5.369 | -5.304 | -5.198 | -5.507 | -5.324     |
| <i>Caco-2</i>             | 376.9  | 43.2   | 319.4  | 81.8   | 753.7      |
| <i>logBB</i>              | -0.869 | -2.058 | -0.812 | -1.798 | -0.503     |
| <i>logK<sub>HSA</sub></i> | 0.200  | 0.027  | 0.300  | -0.075 | 0.687      |
| <i>HOA (%)</i>            | 89 %   | 65 %   | 90 %   | 70 %   | 100        |

\* Positive control used in the CK1 $\delta$  Activity Assays.

#### Legenda

- Good
- Average
- Bad

#### Range or recommended values

|                                                                                                 |                            |
|-------------------------------------------------------------------------------------------------|----------------------------|
| <i>logP (o/w)</i> : Predicted octanol/water partition coefficient.                              | -2.0 – 6.5                 |
| <i>logS</i> : Predicted aqueous solubility (mol dm <sup>-3</sup> ).                             | -6.5 – 0.5                 |
| <i>logHERG</i> : Predicted IC <sub>50</sub> value for blockage of HERG K <sup>+</sup> channels. | -5                         |
| <i>Caco-2</i> : Predicted apparent Caco-2 cell permeability in nm/sec.                          | <25 poor, >500 great       |
| <i>logBB</i> : Predicted brain/blood partition coefficient.                                     | -3.0 – 1.2                 |
| <i>logK<sub>HSA</sub></i> : Prediction of binding to human serum albumin.                       | -1.5 – 1.5                 |
| <i>HOA (%)</i> : Prediction of human oral absorption on 0 to 100% scale.                        | >80% is high, <25% is poor |

**$^1\text{H}$  NMR scanned spectra (DMSOd6) of derivatives 1-32.**

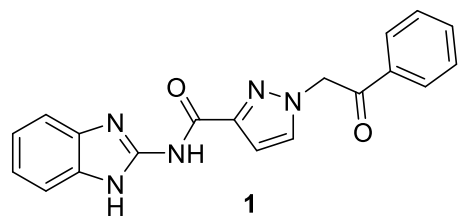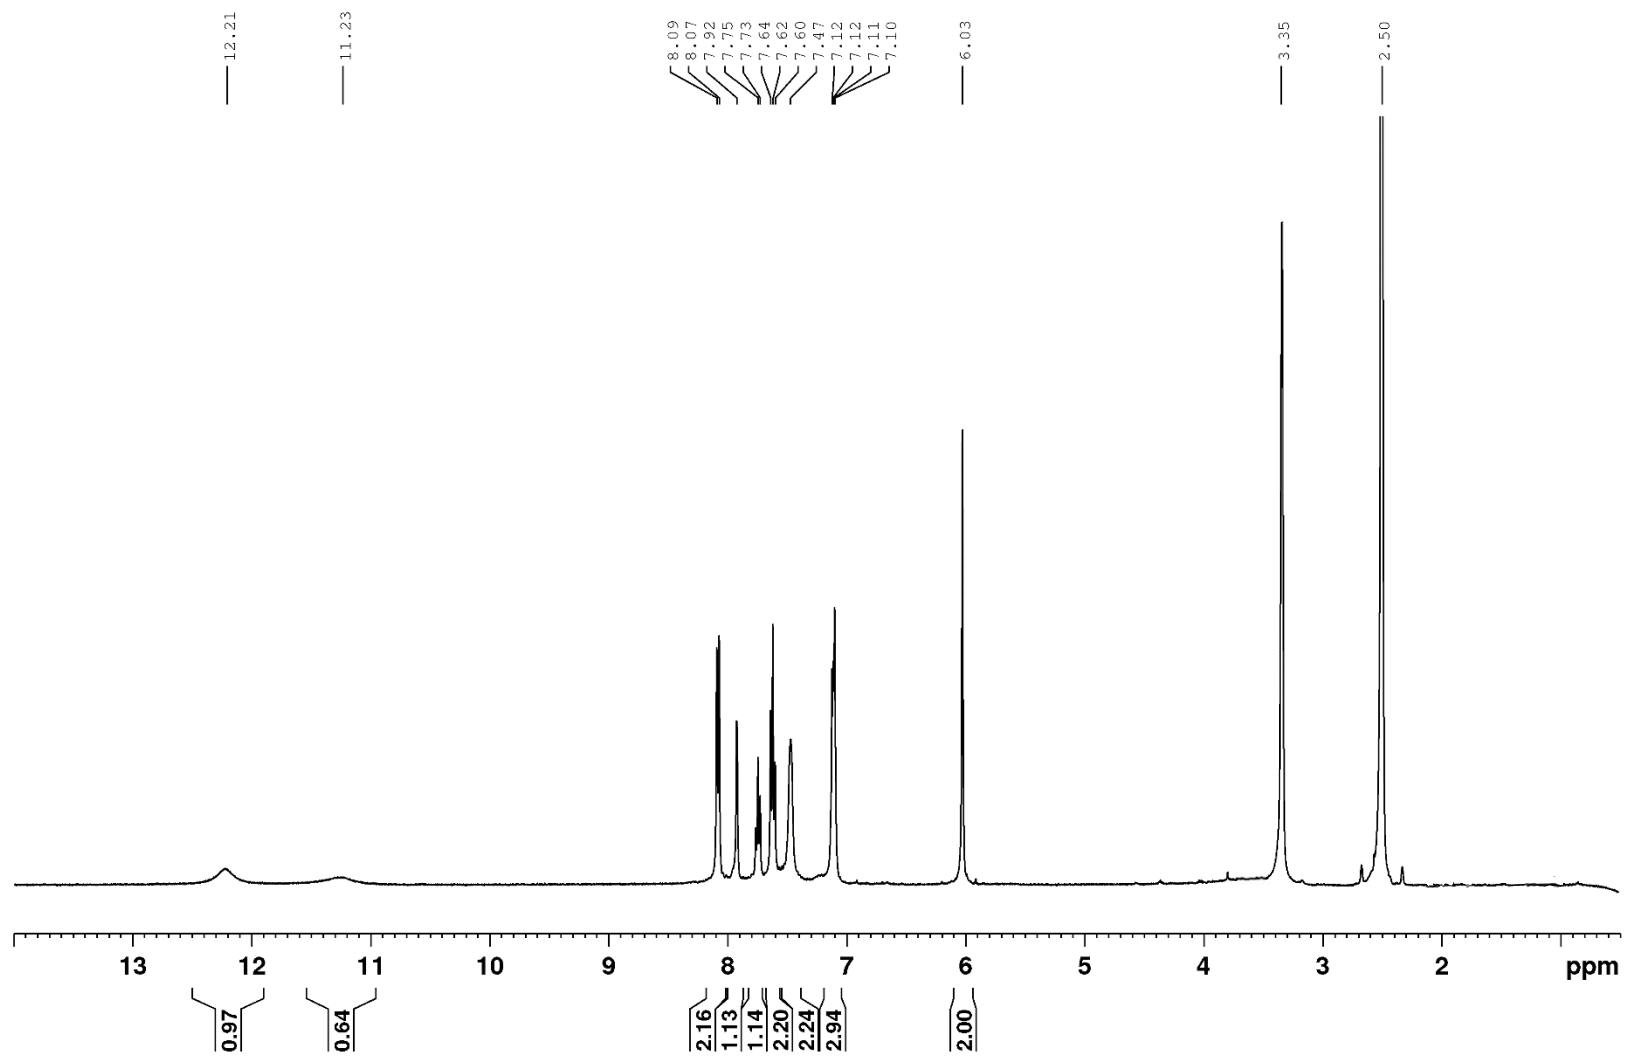

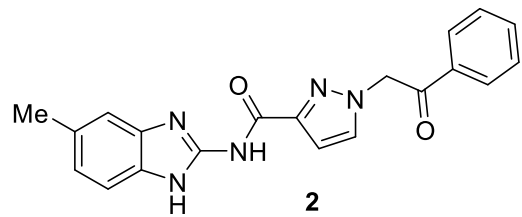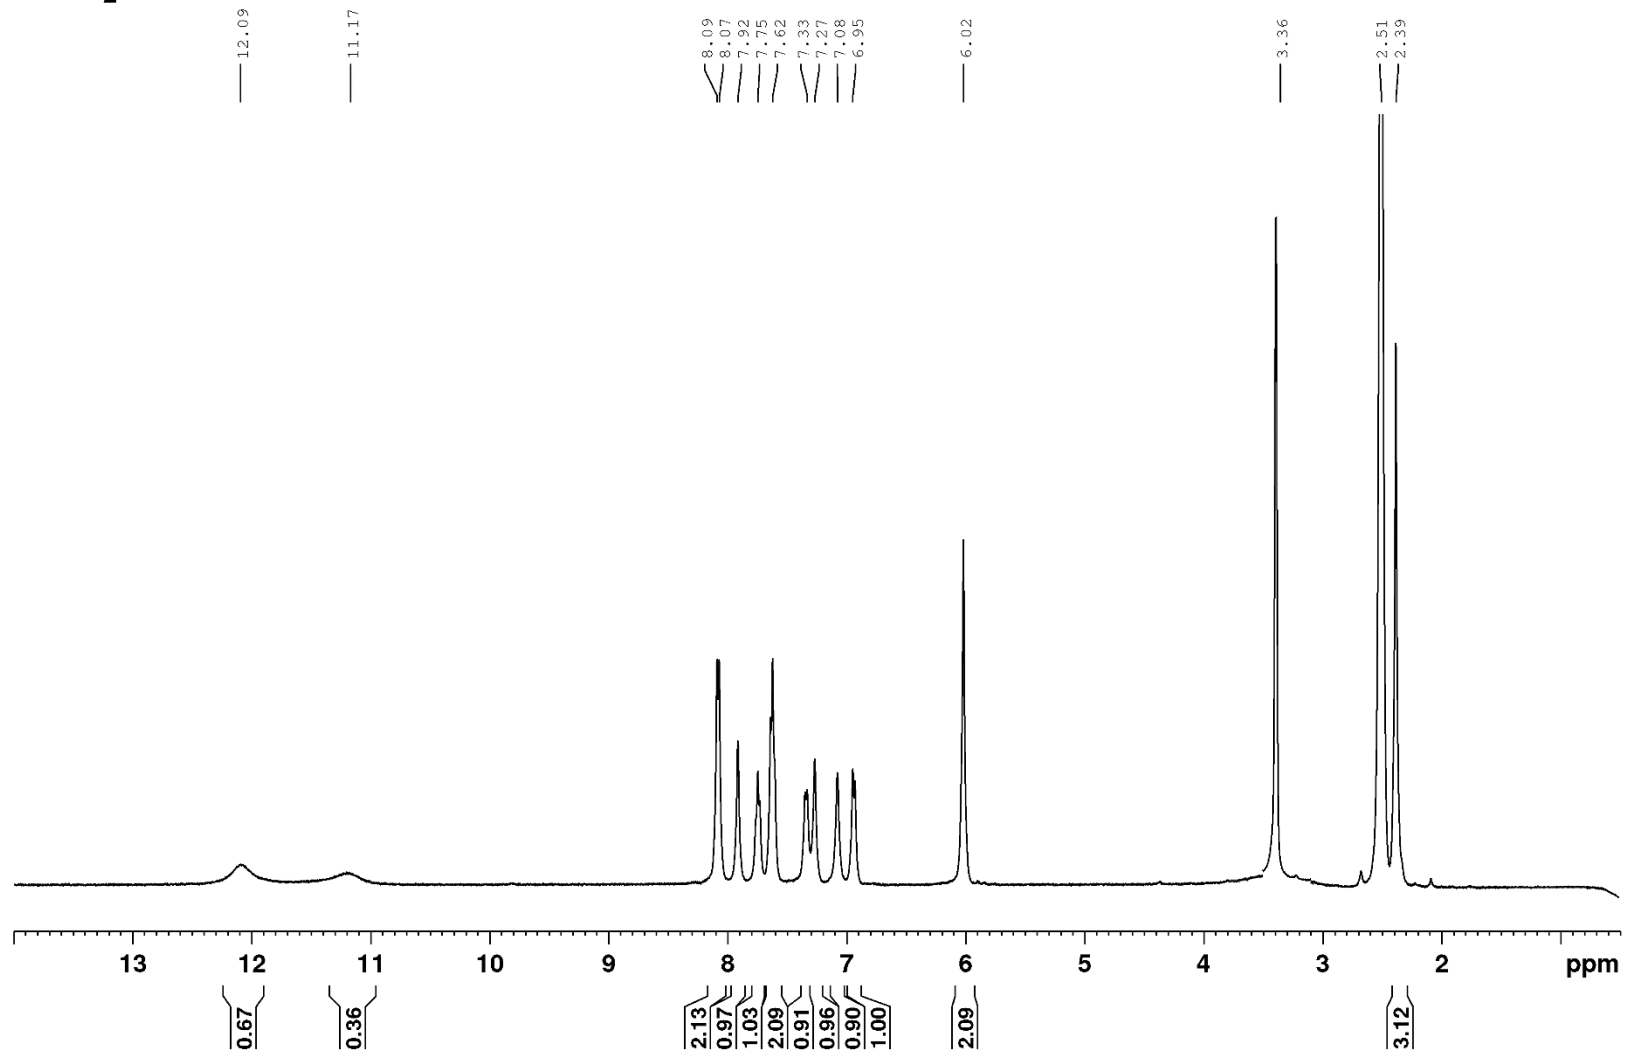

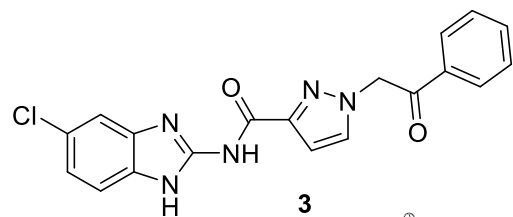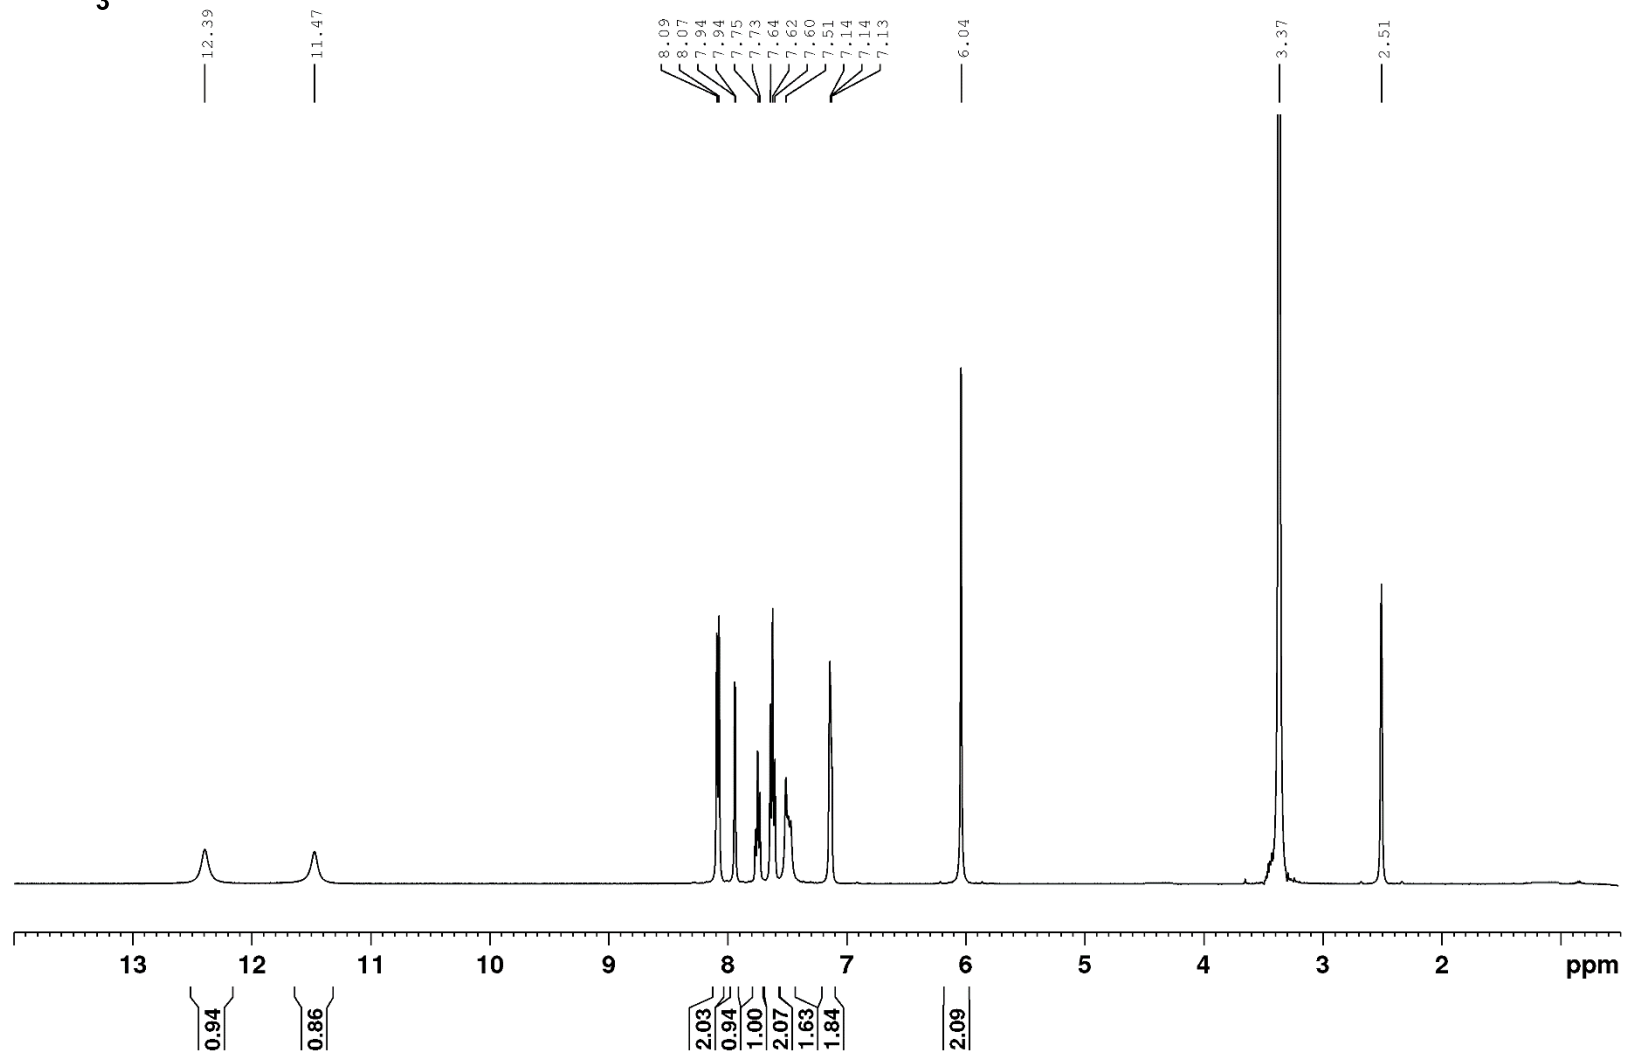

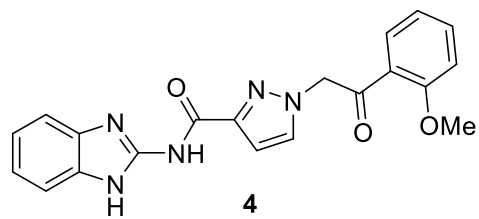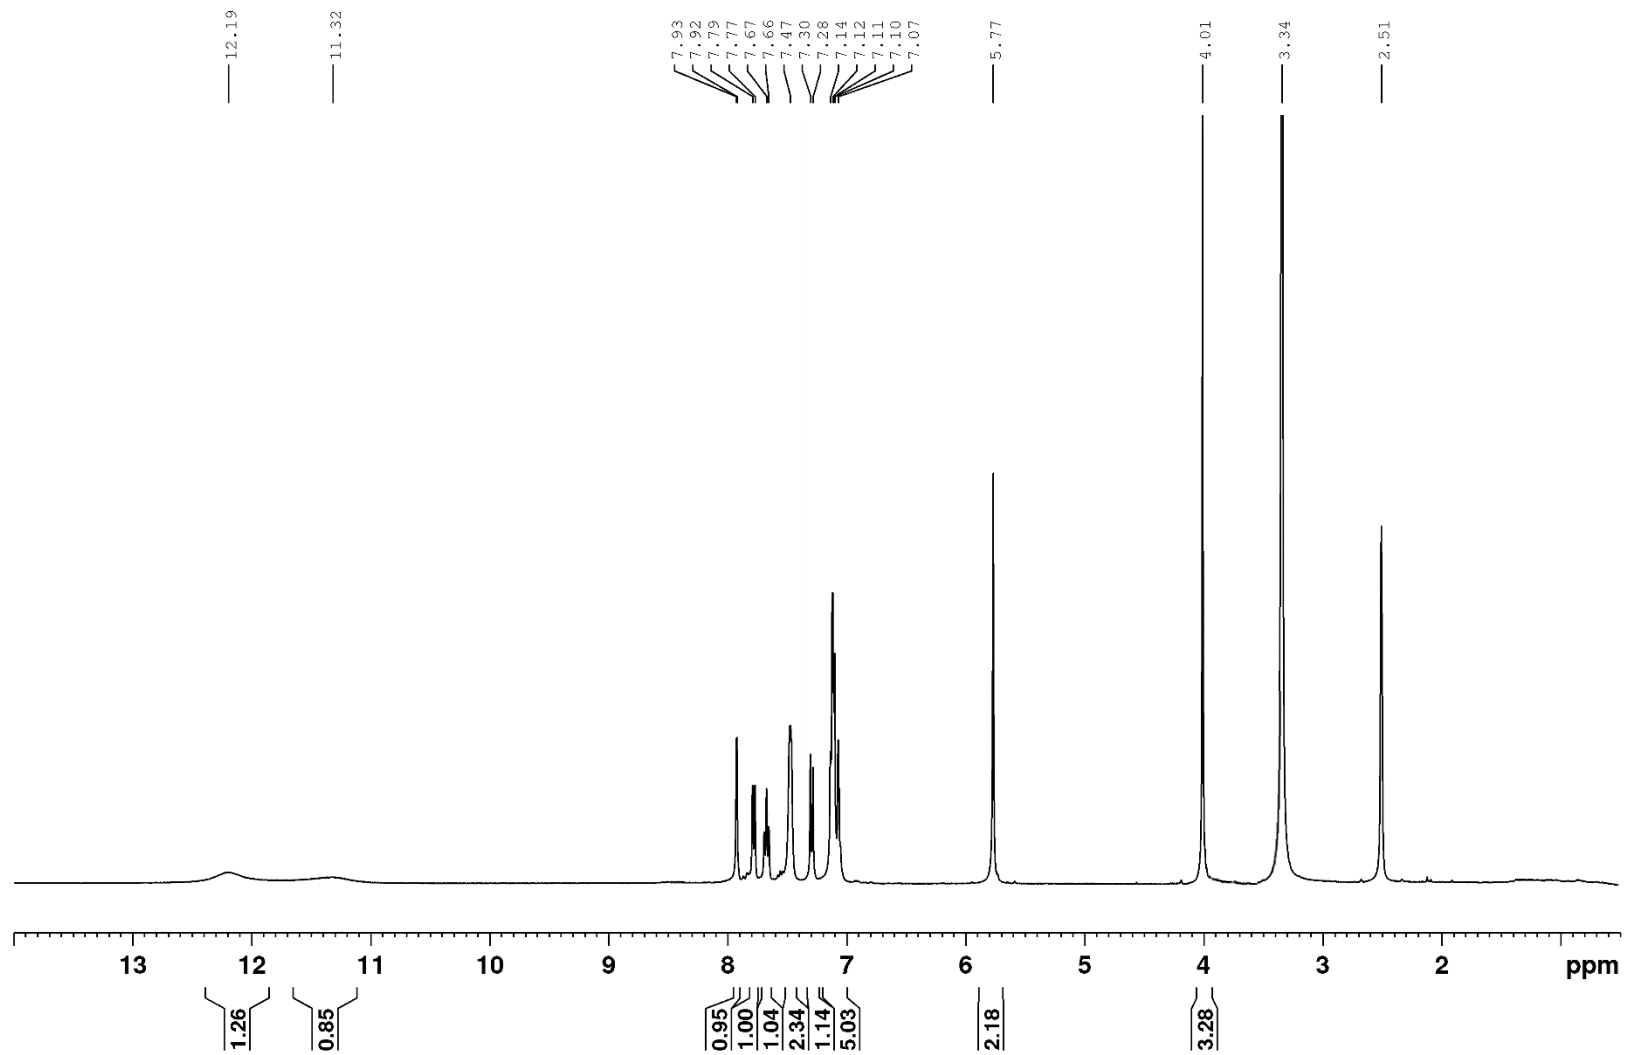

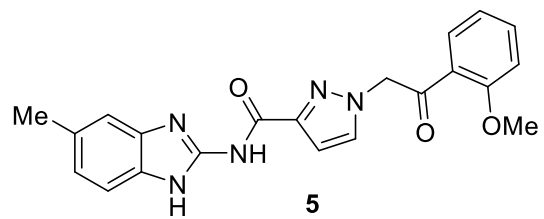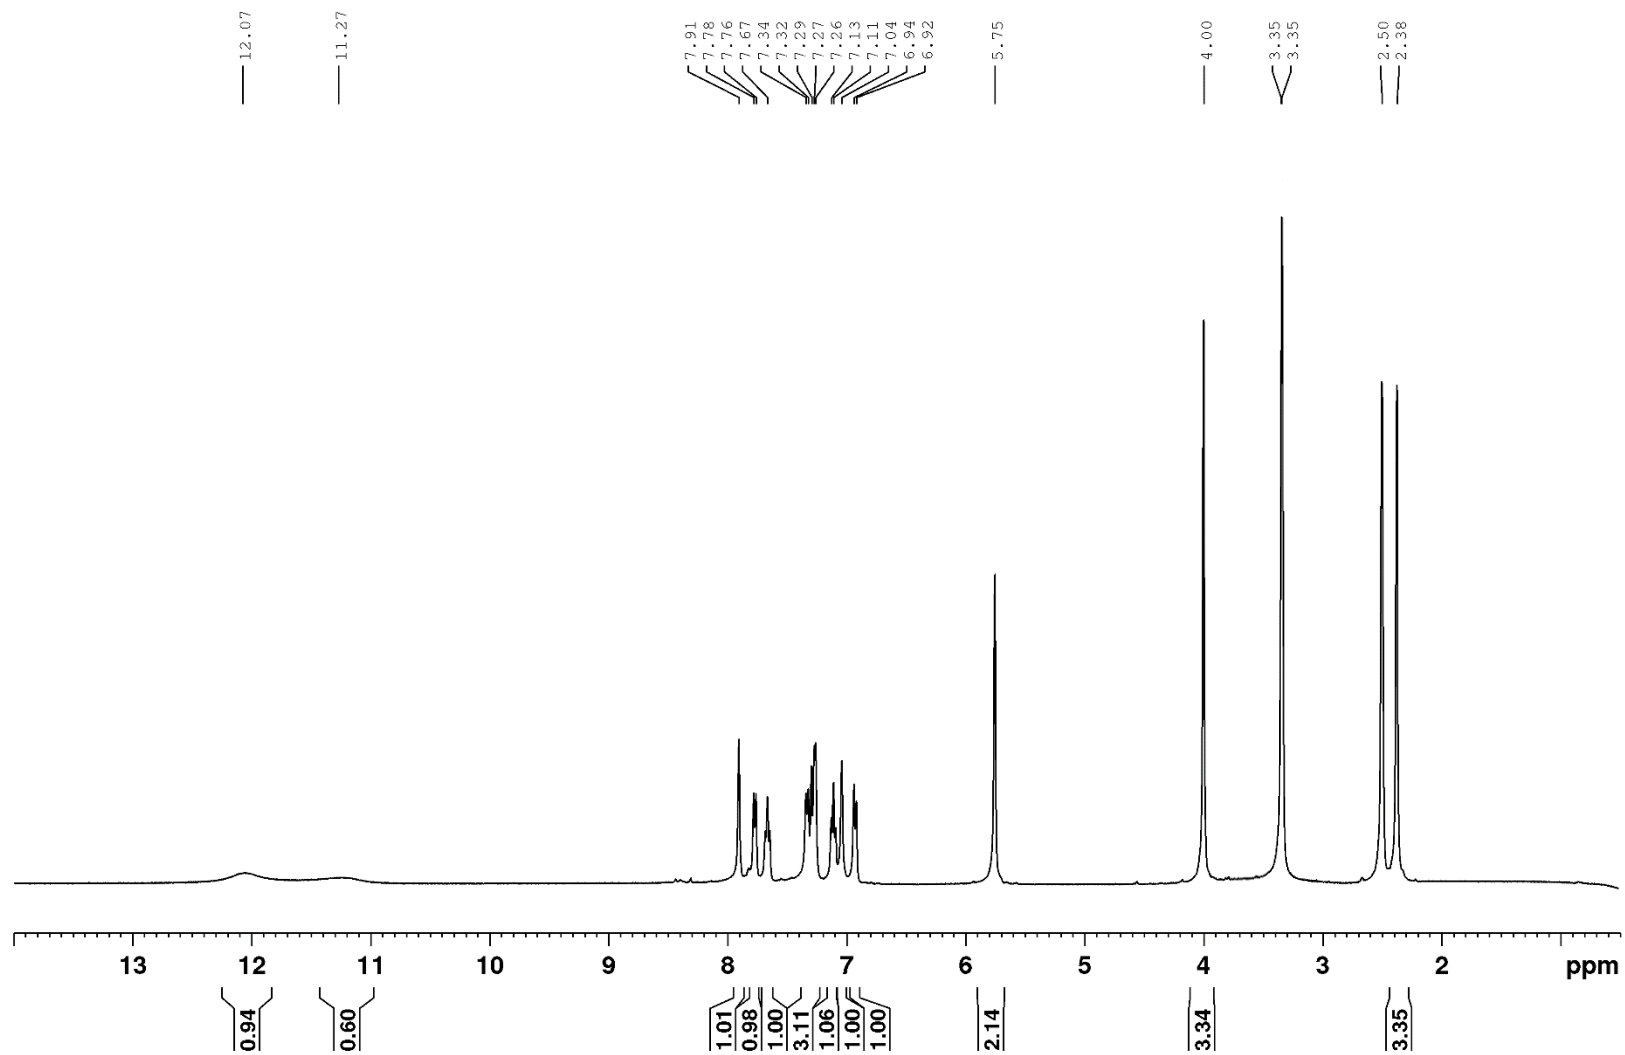



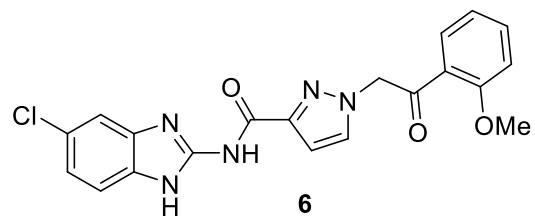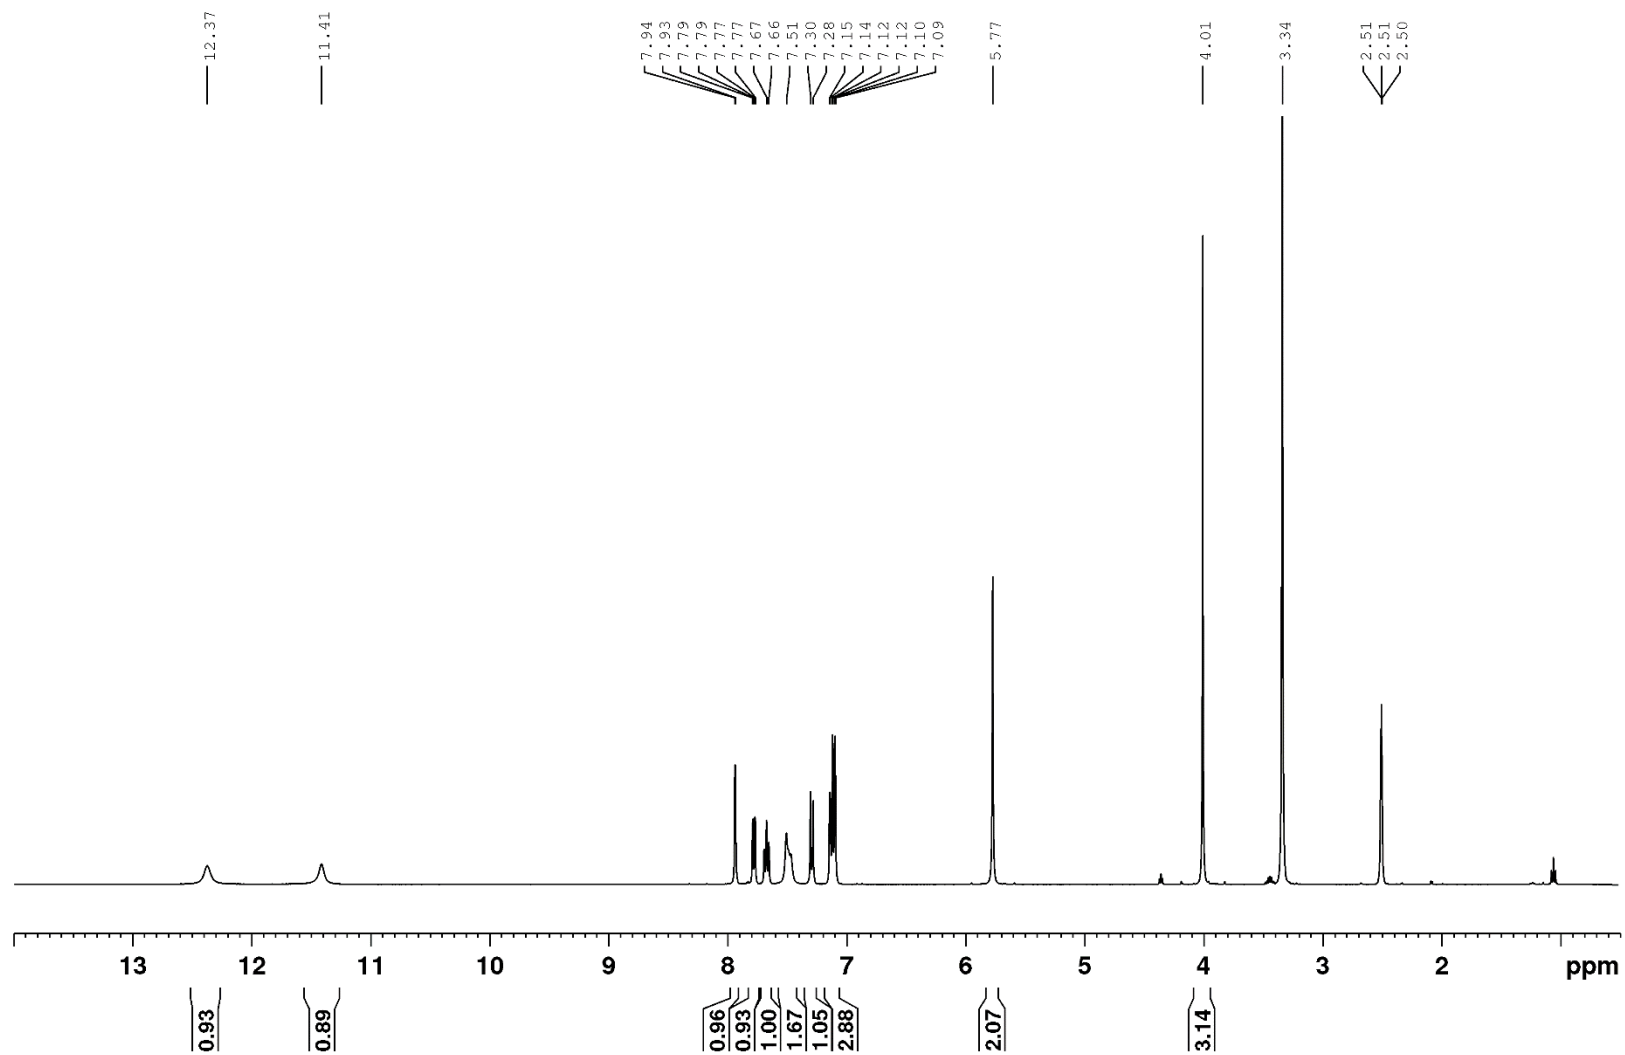

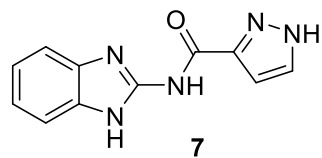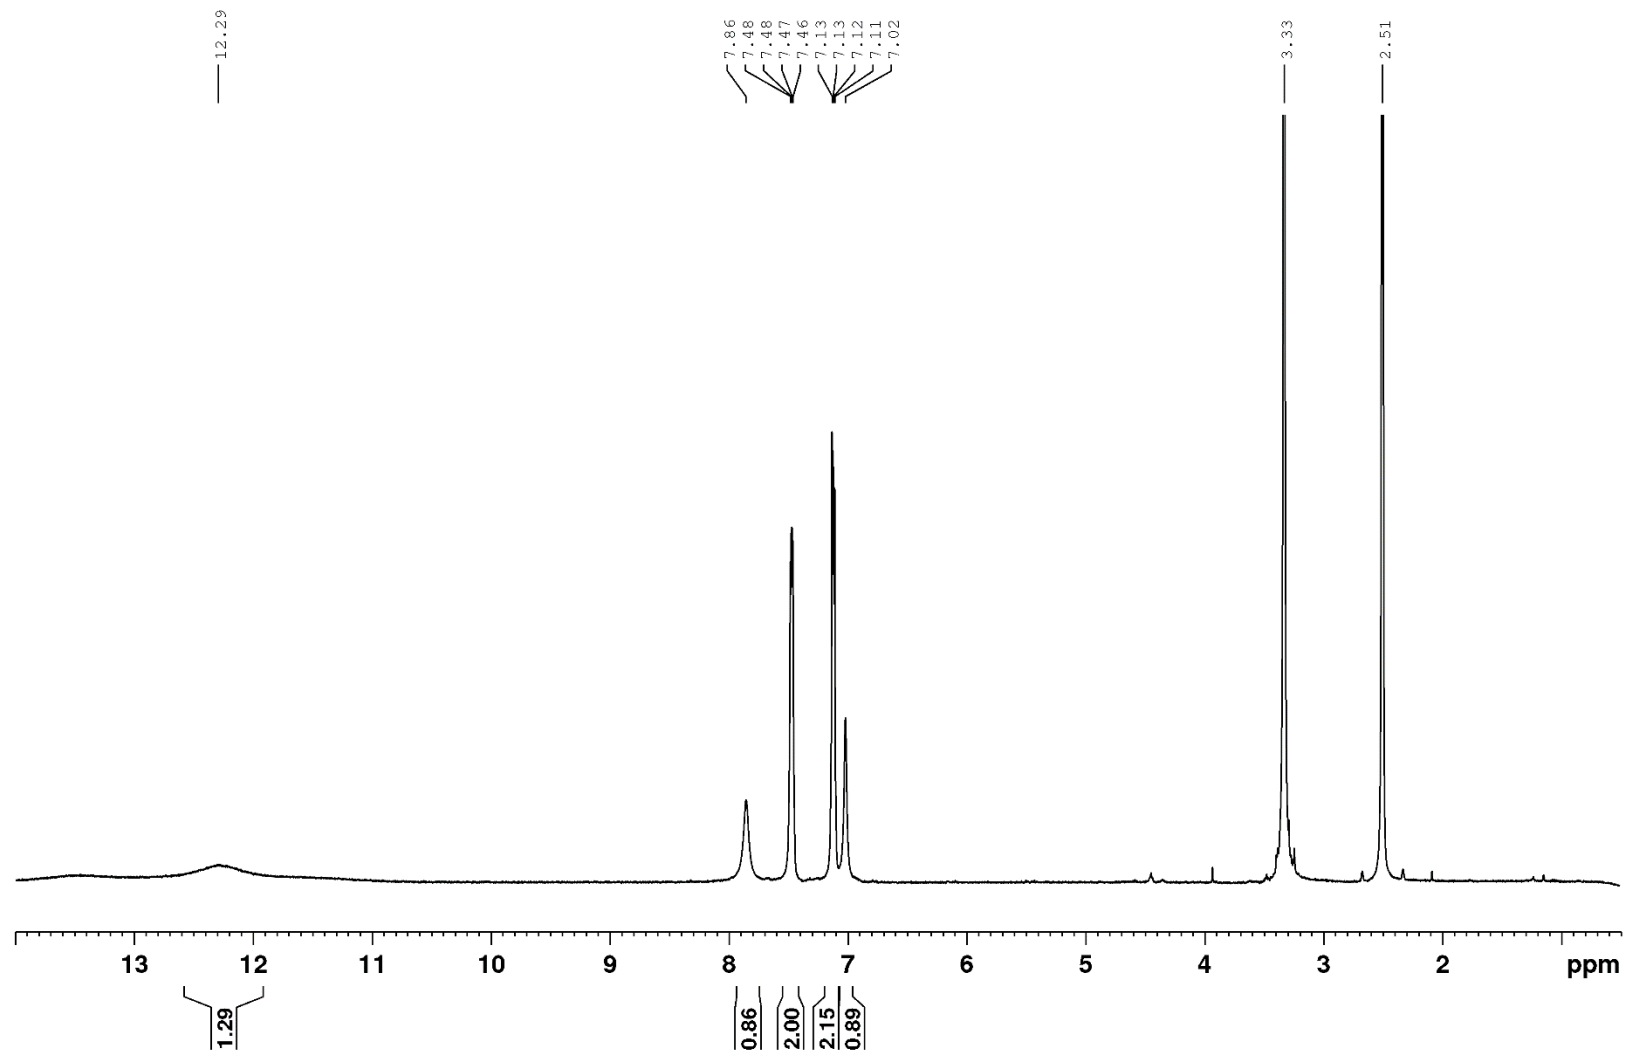

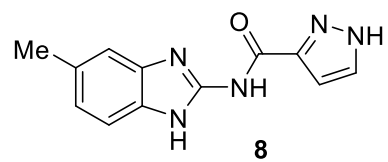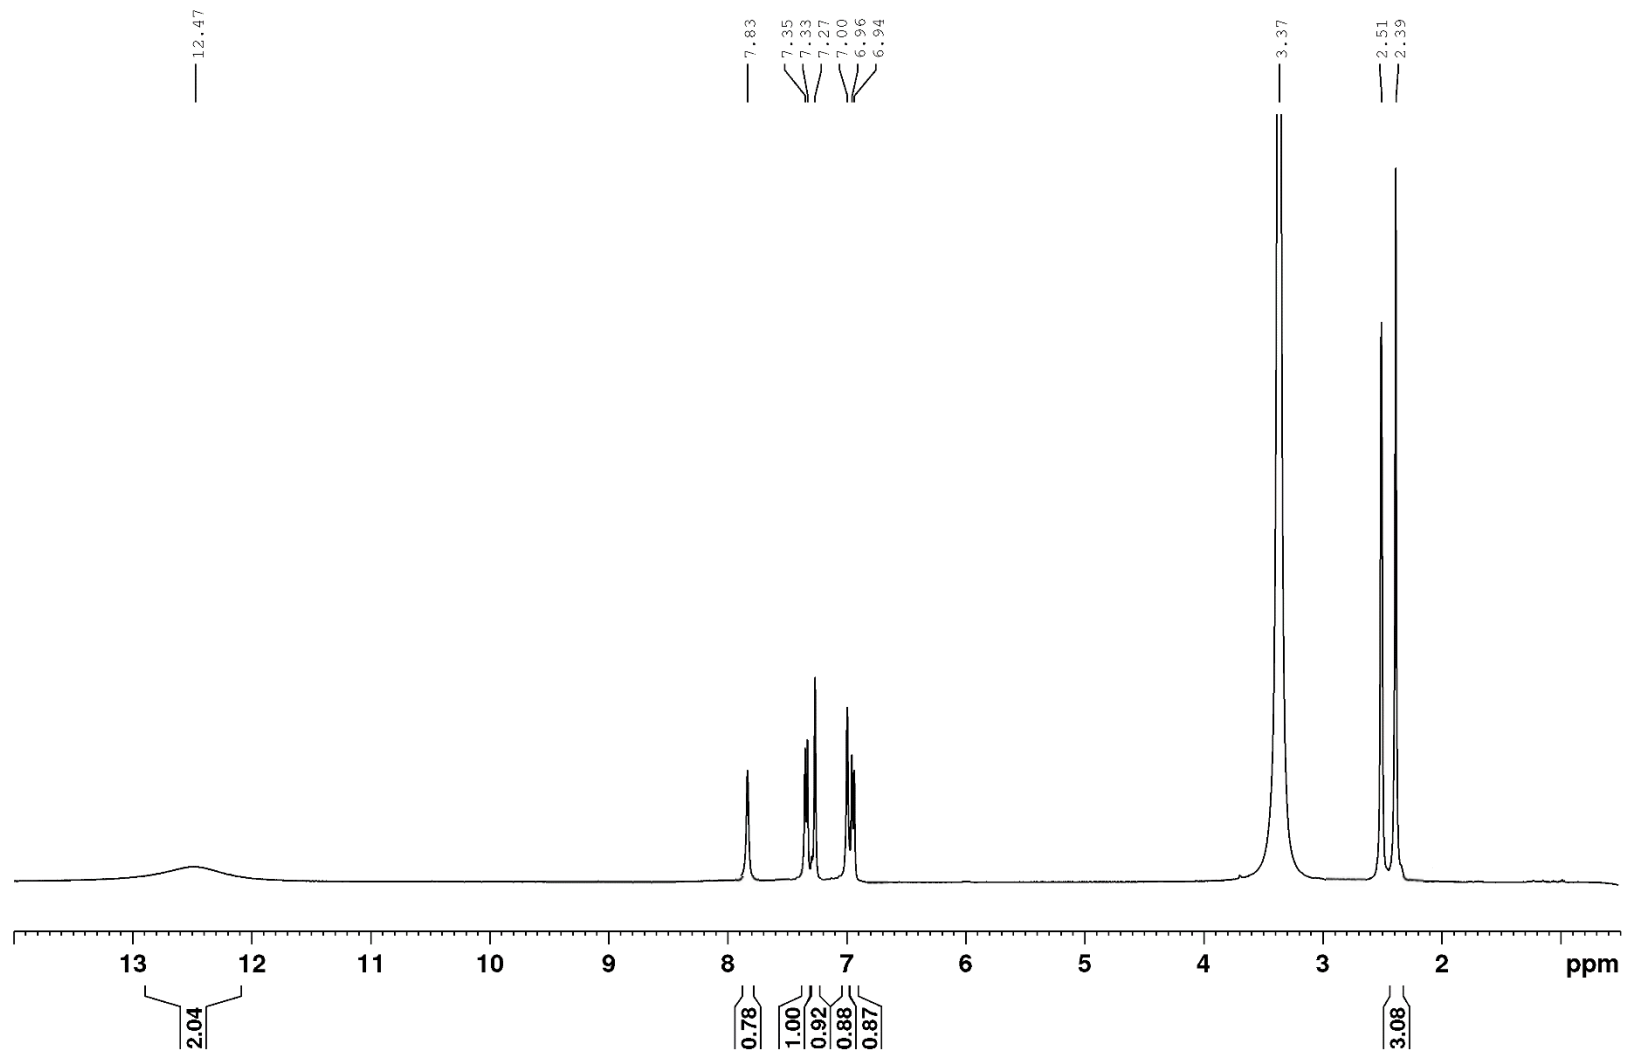

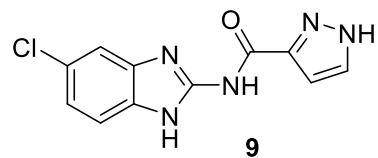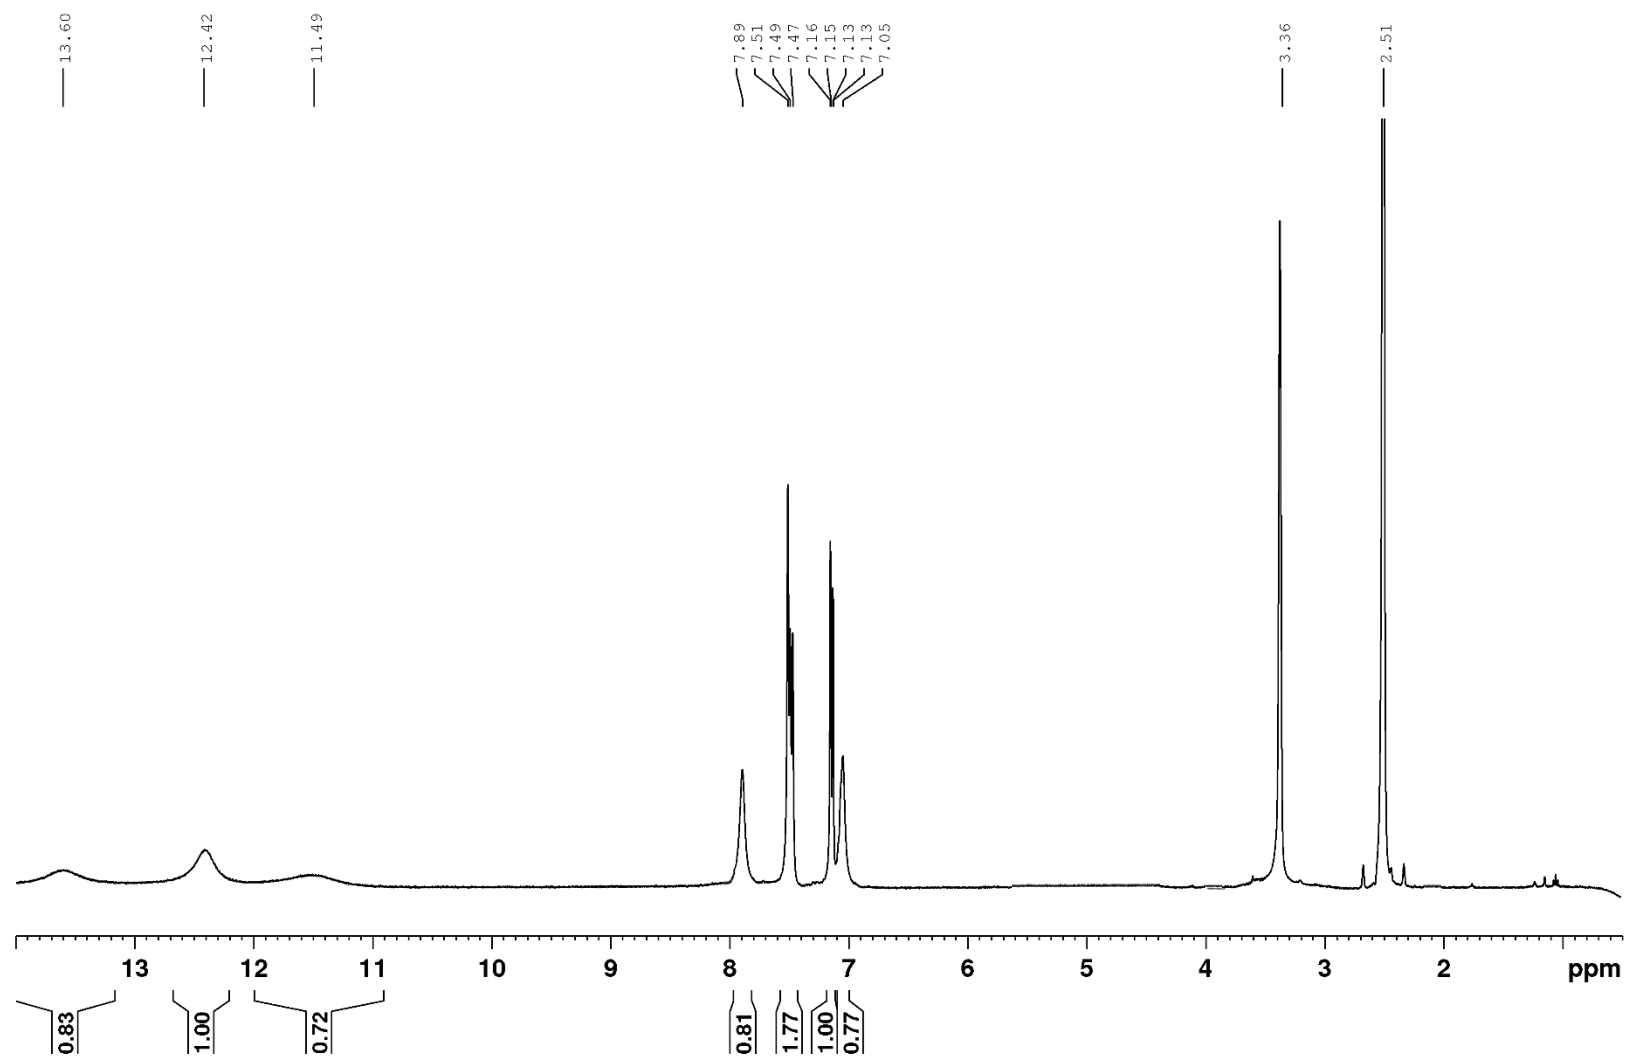

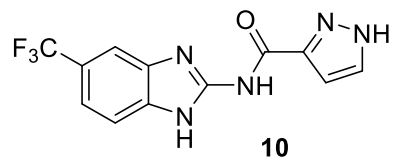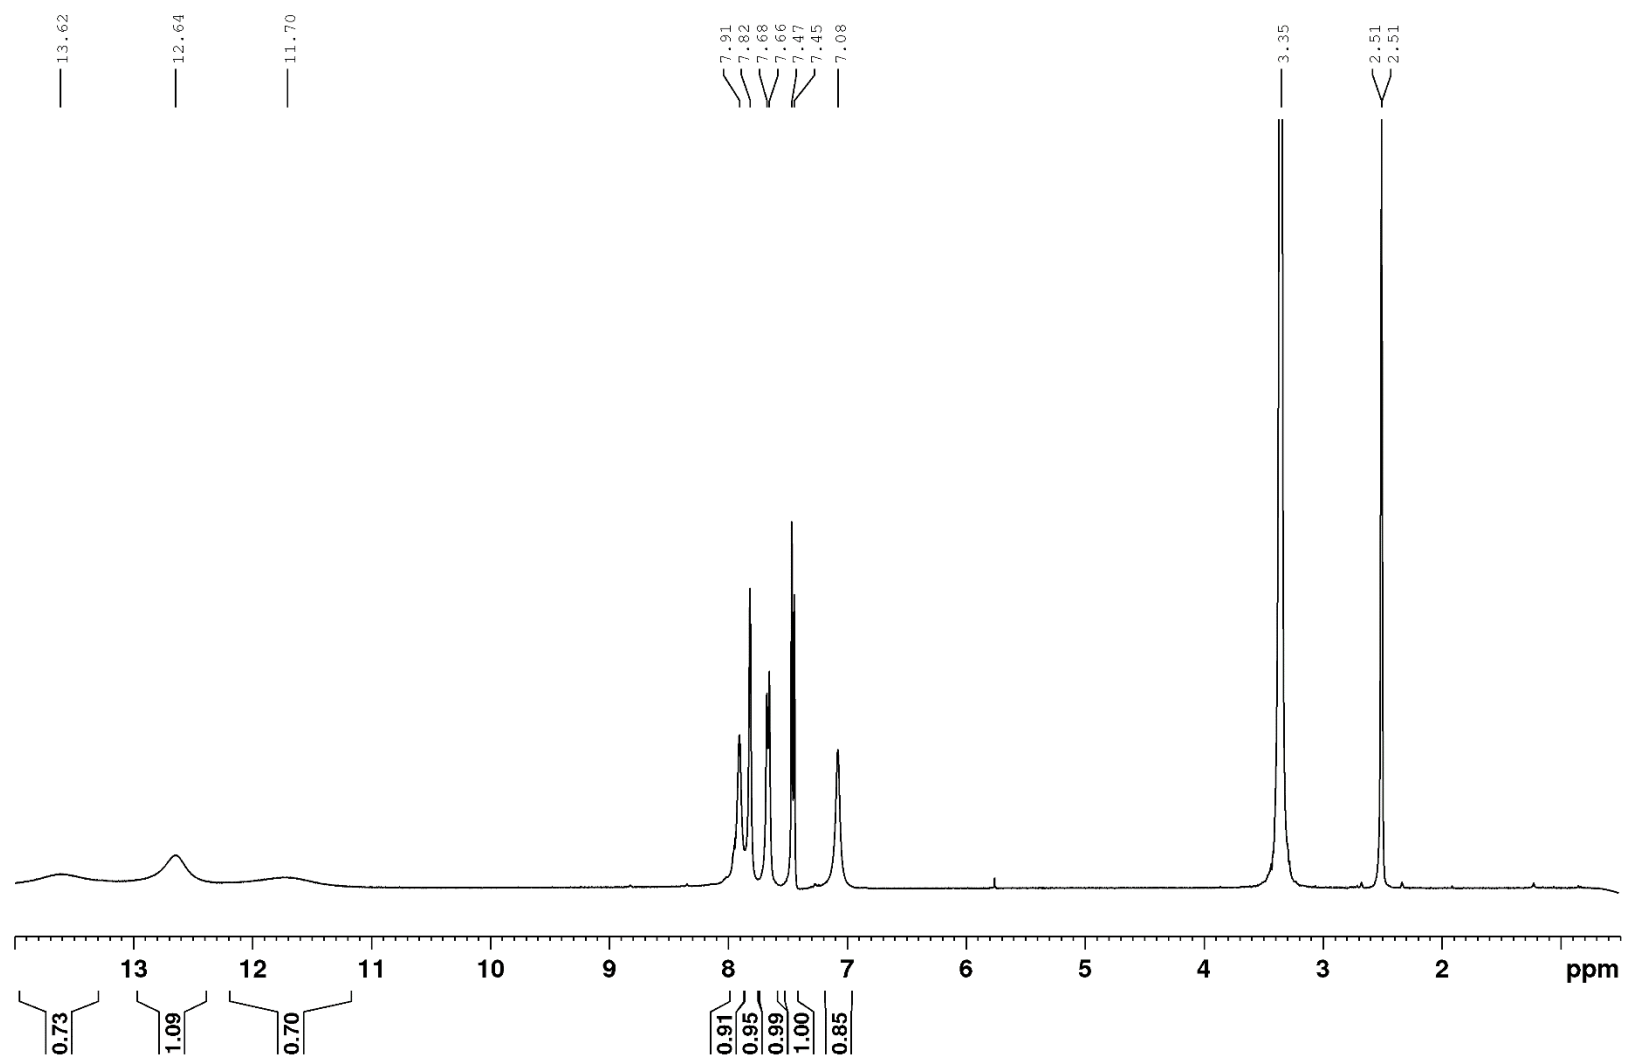

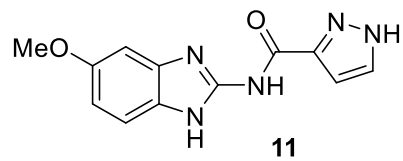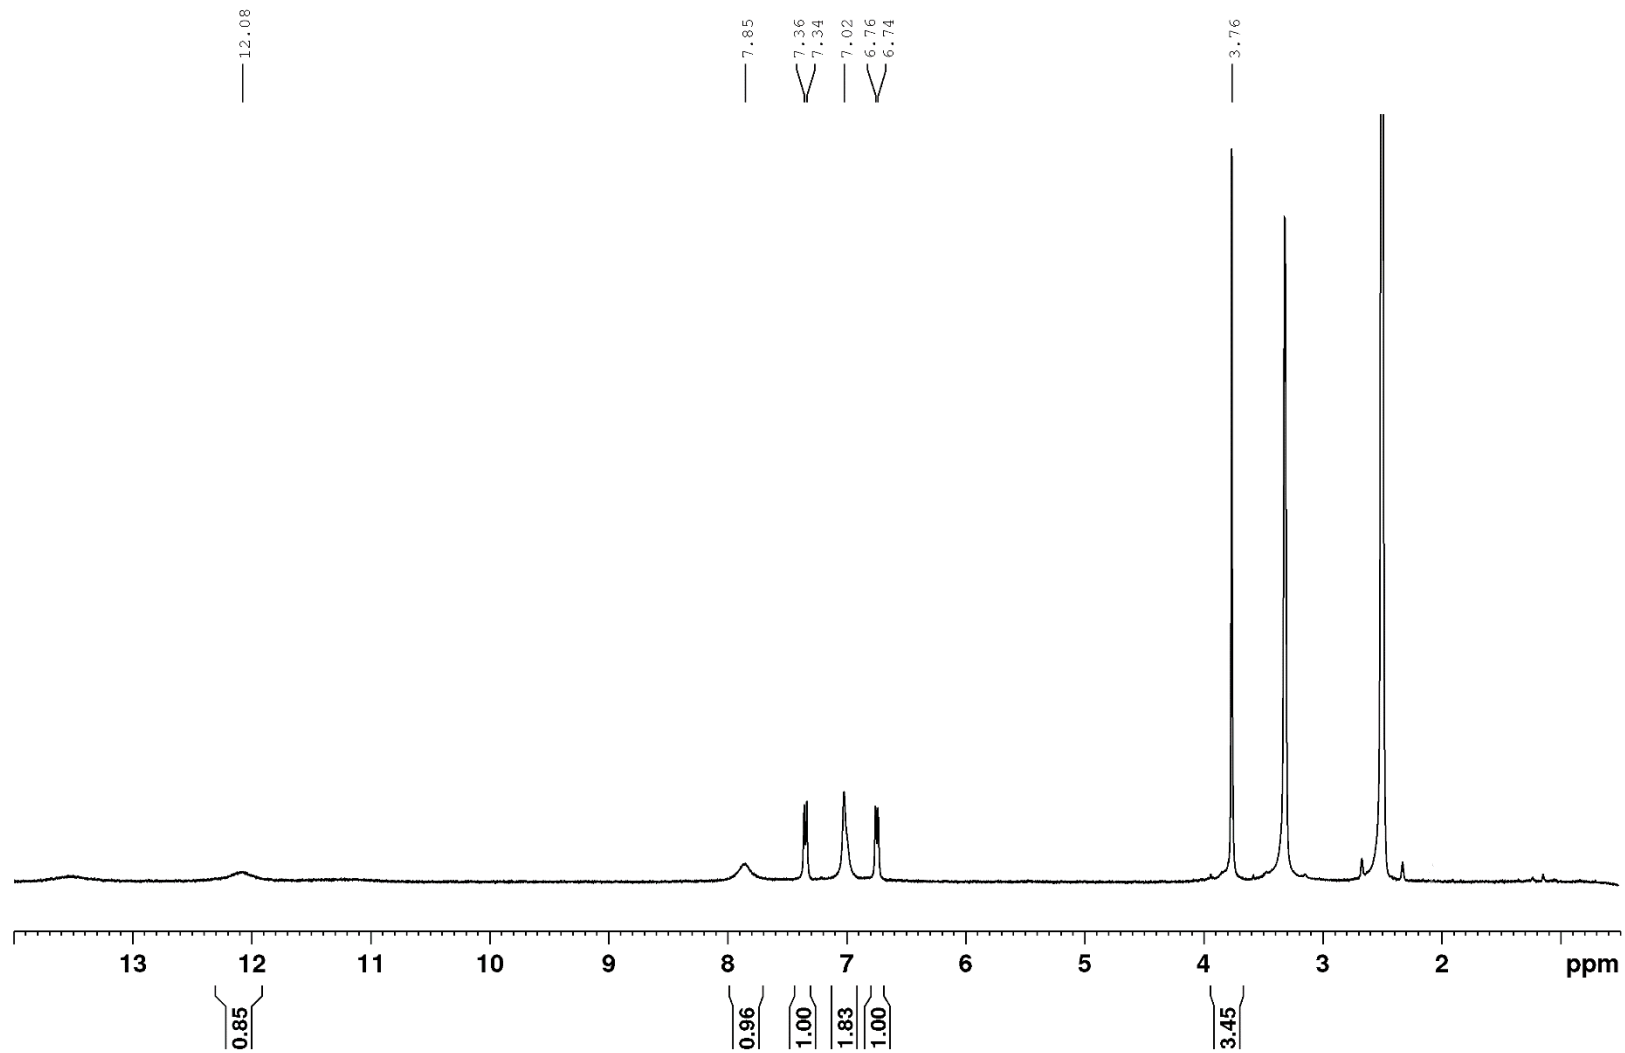

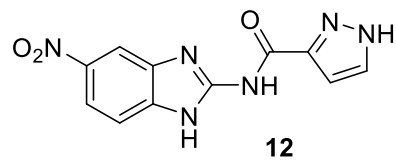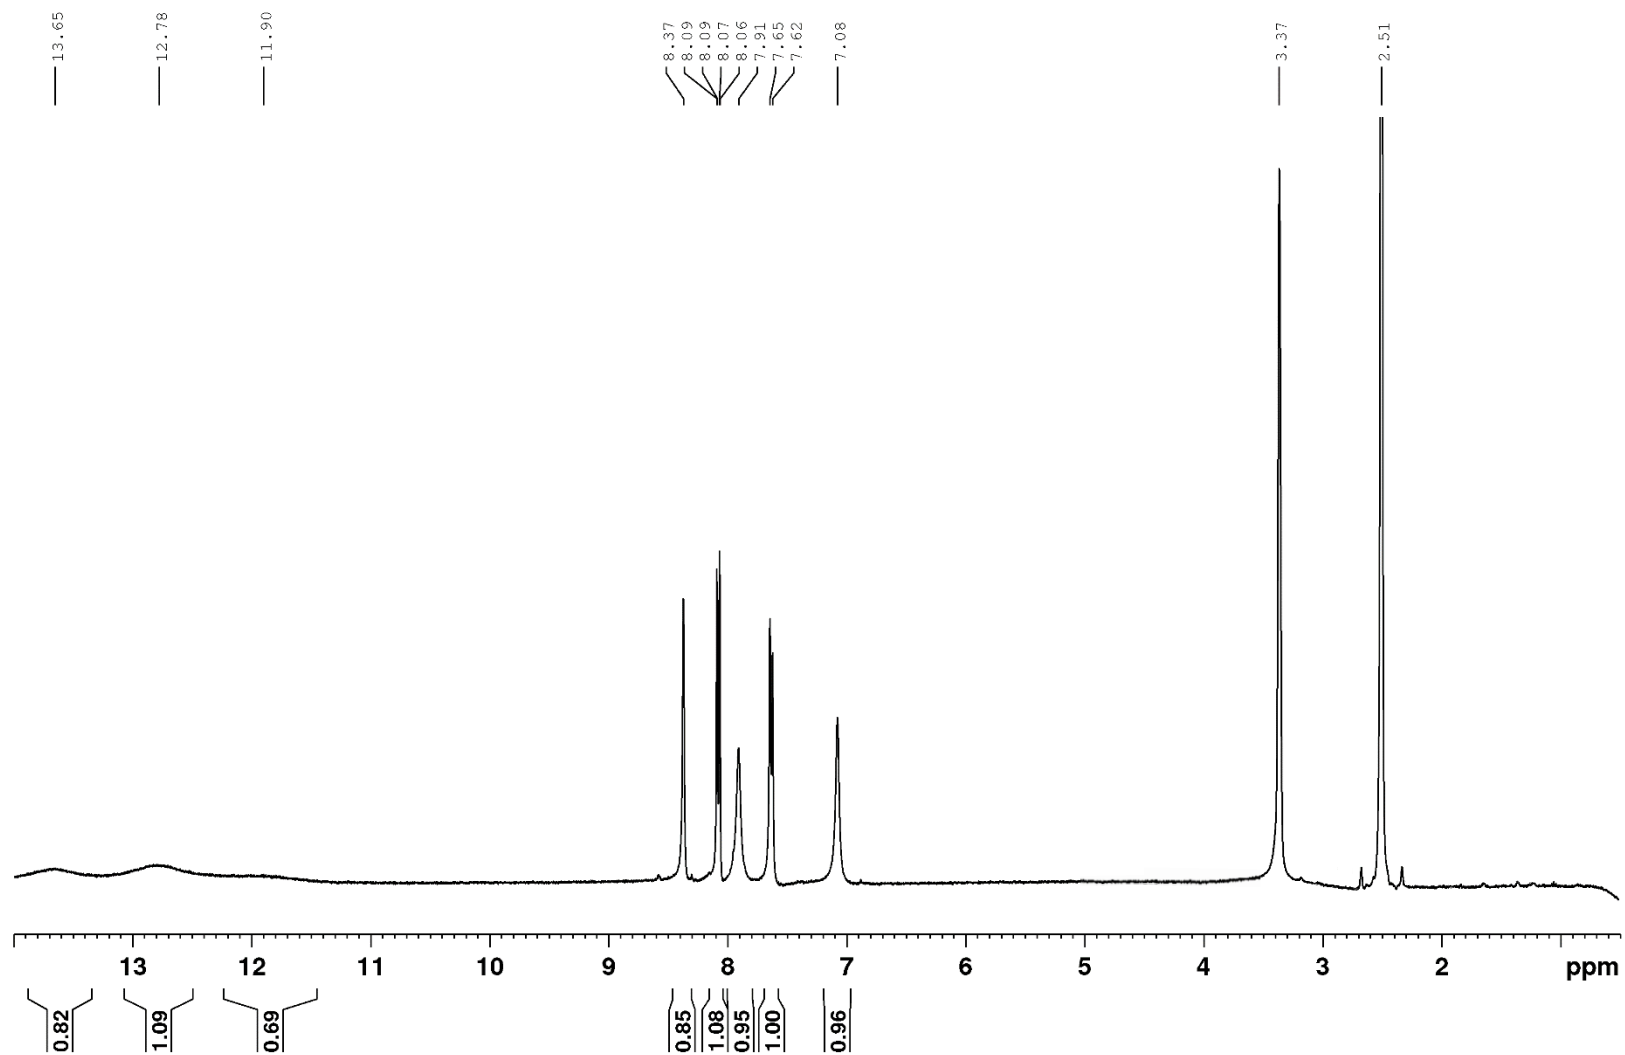

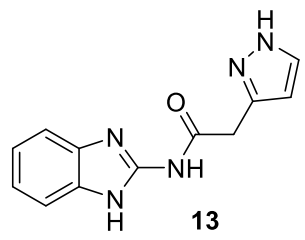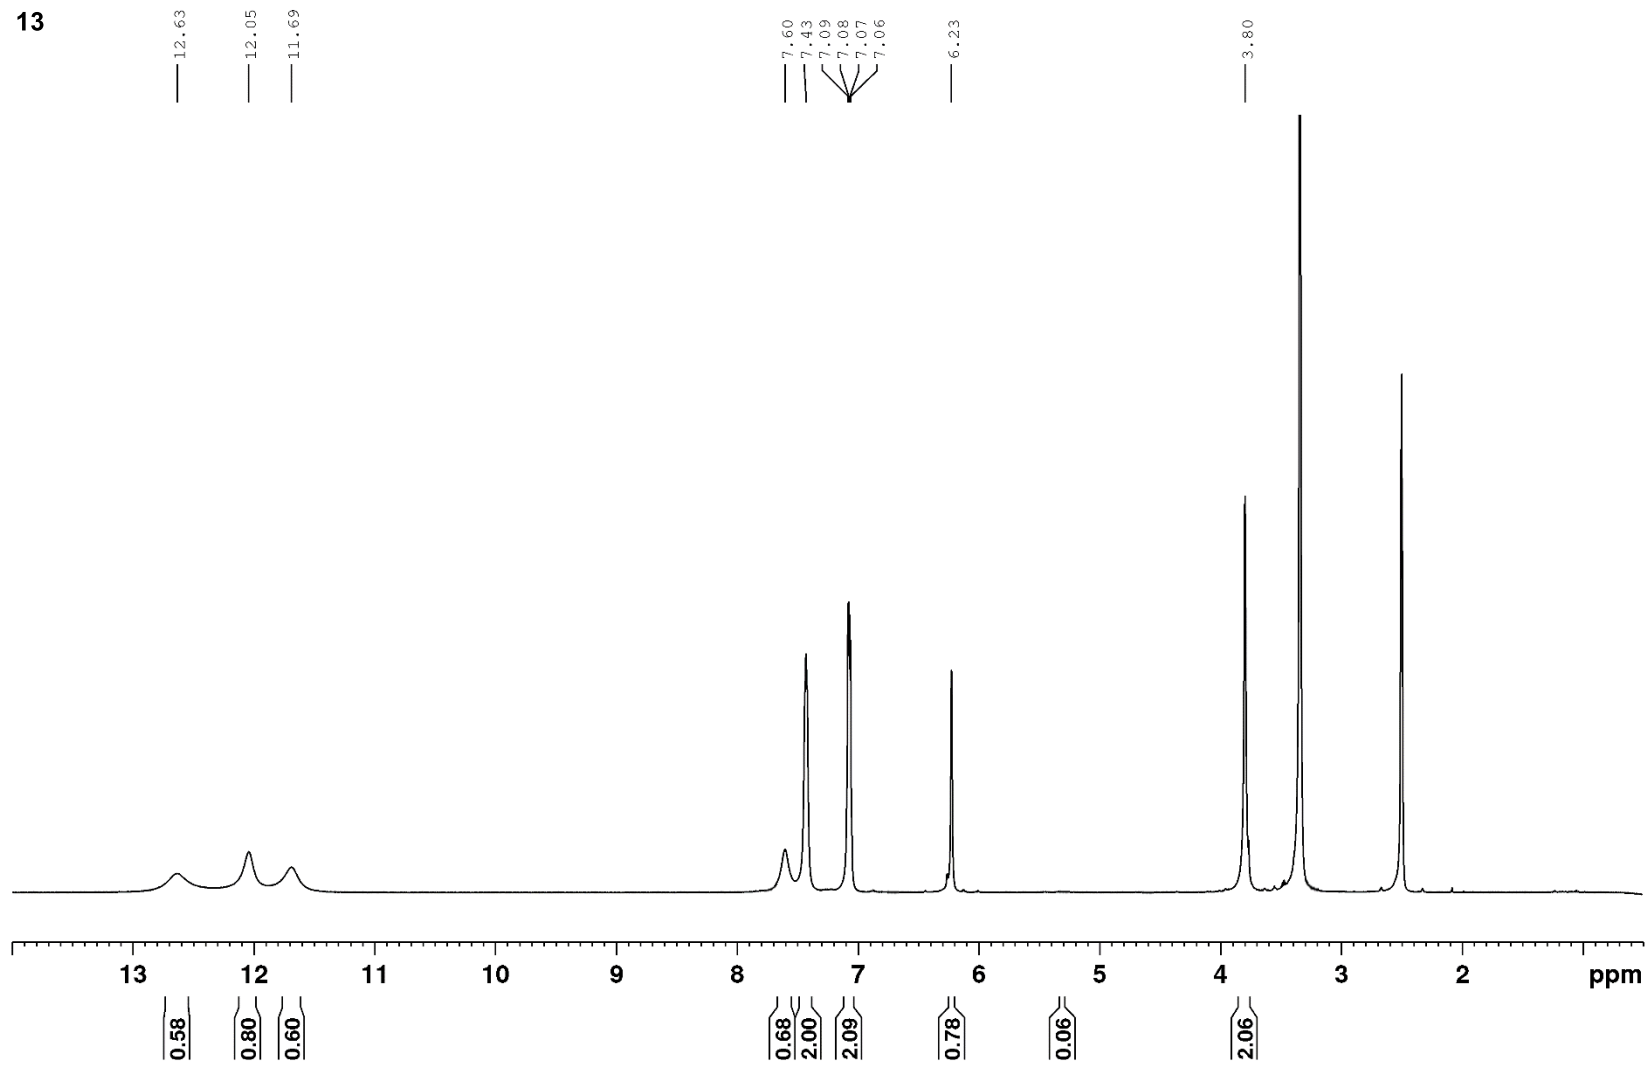



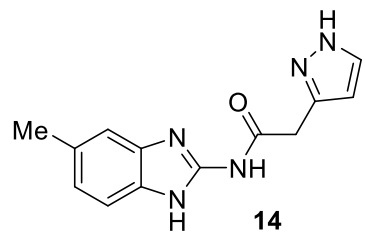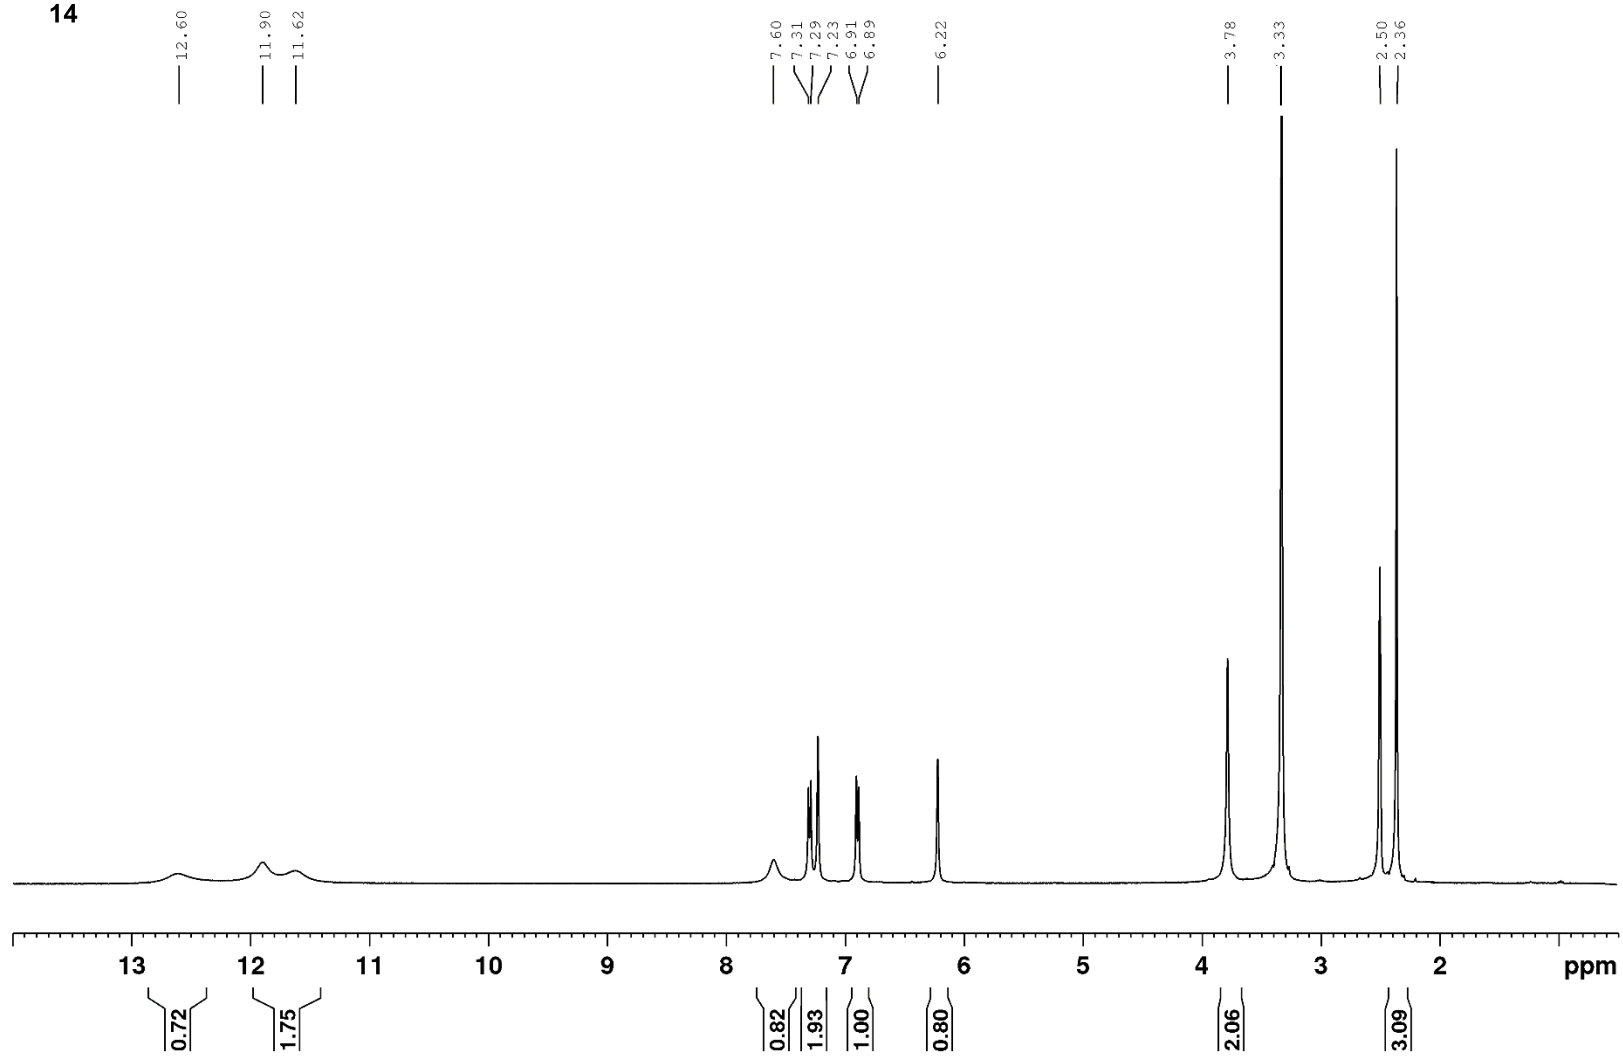

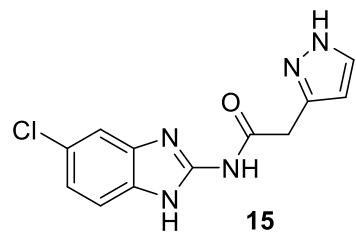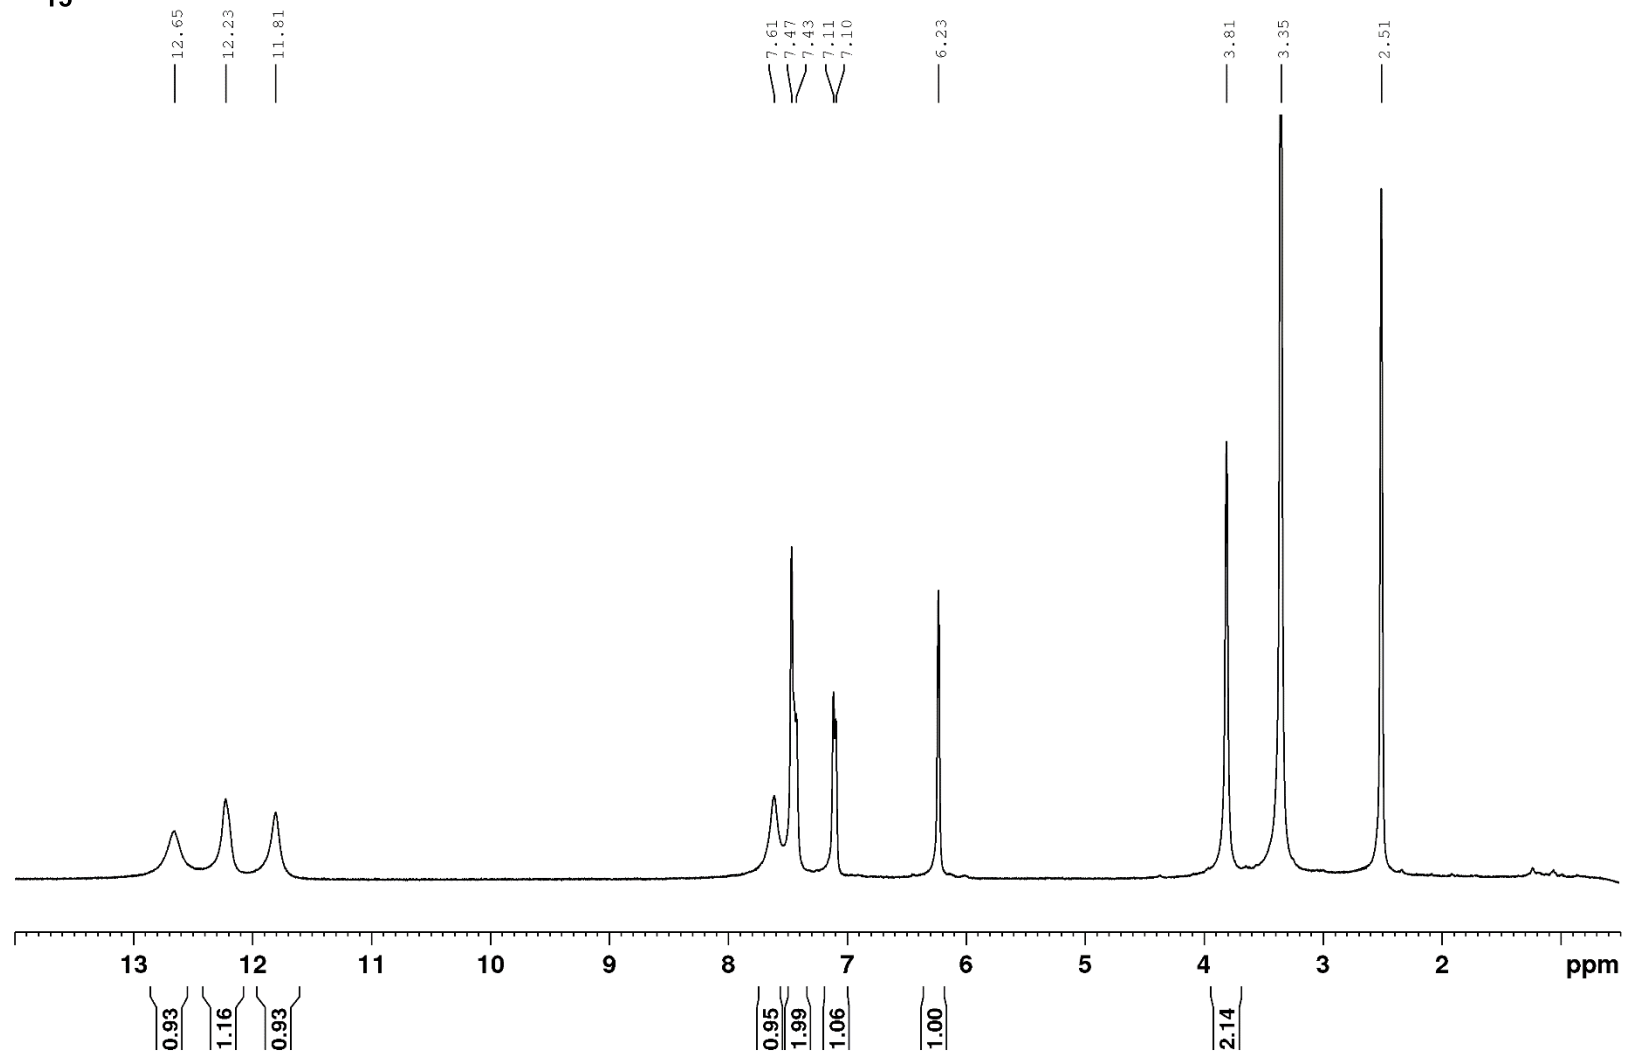

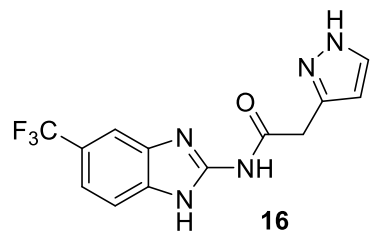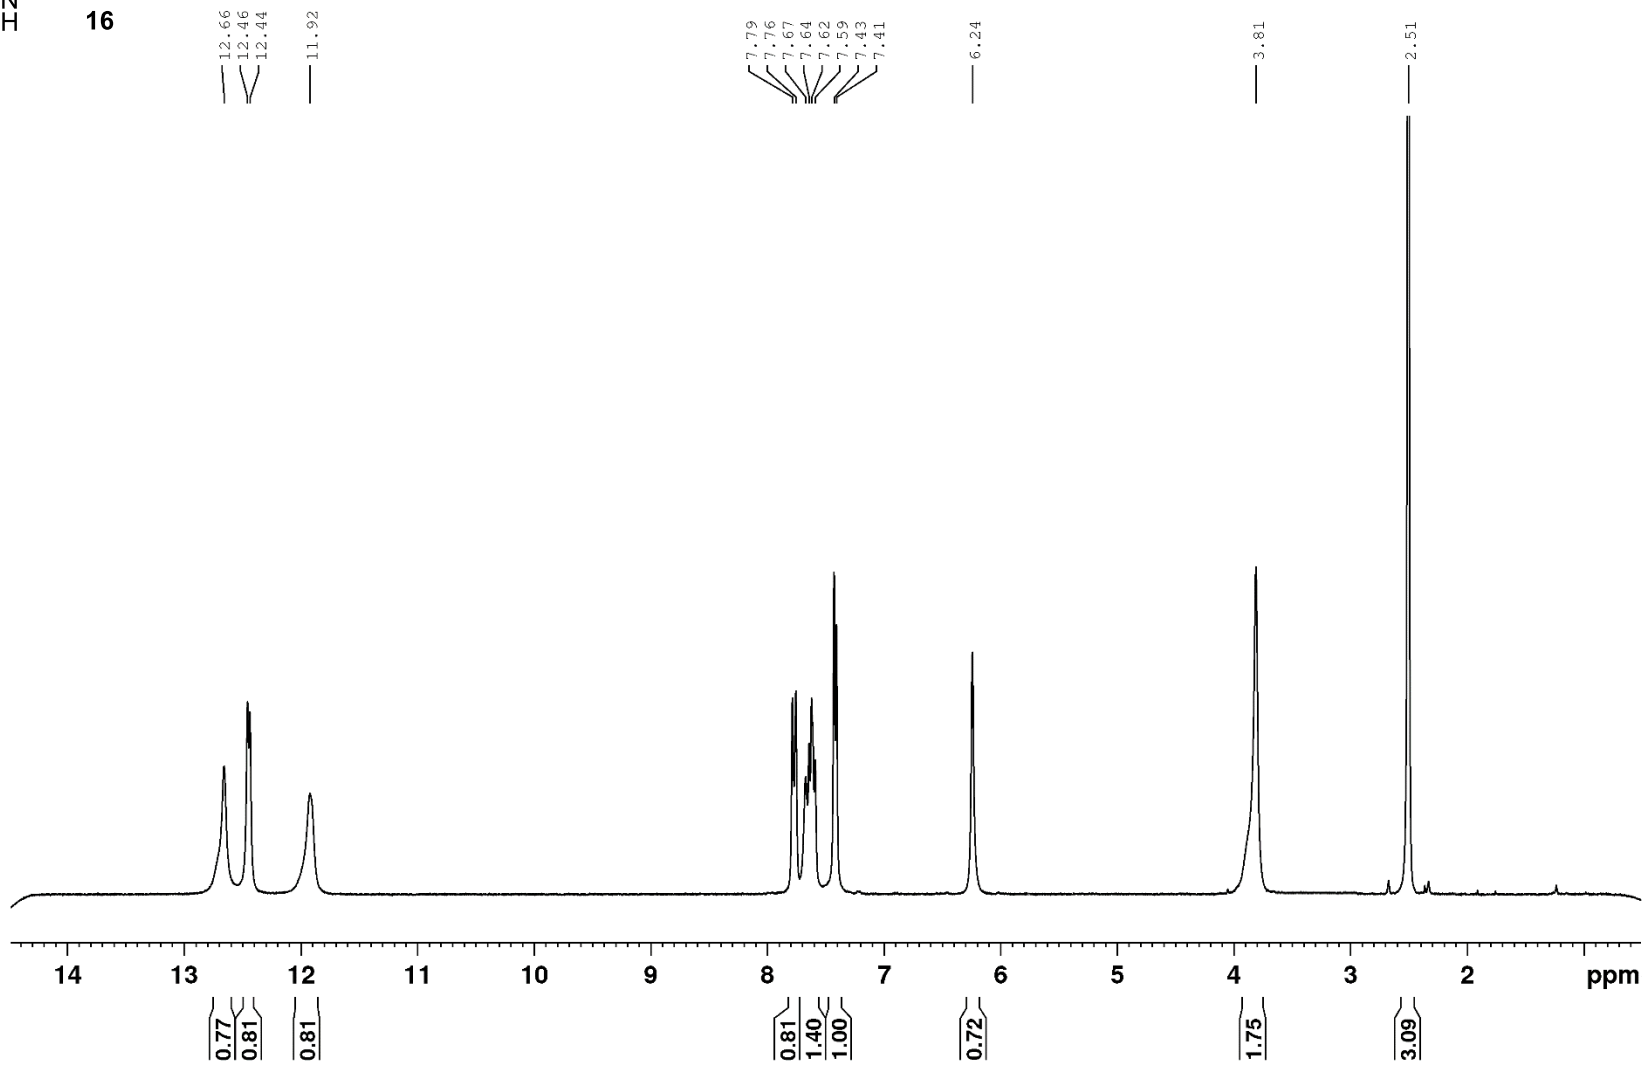

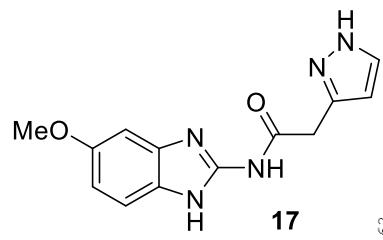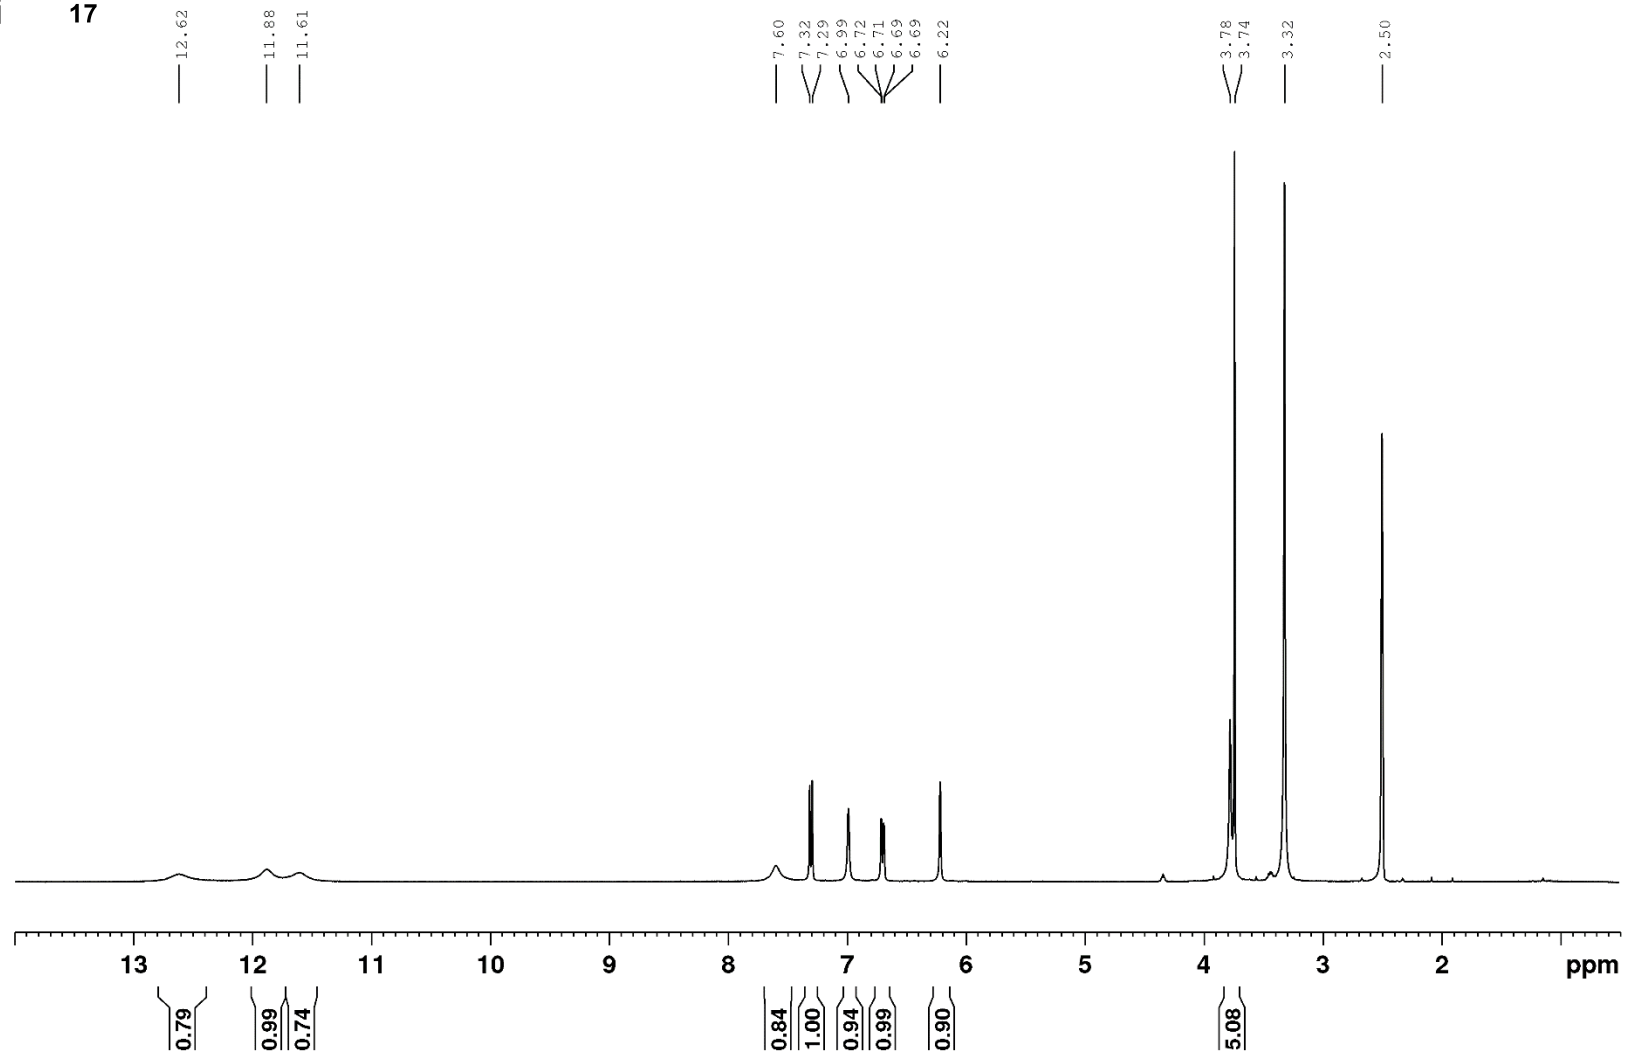

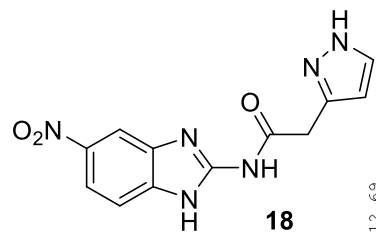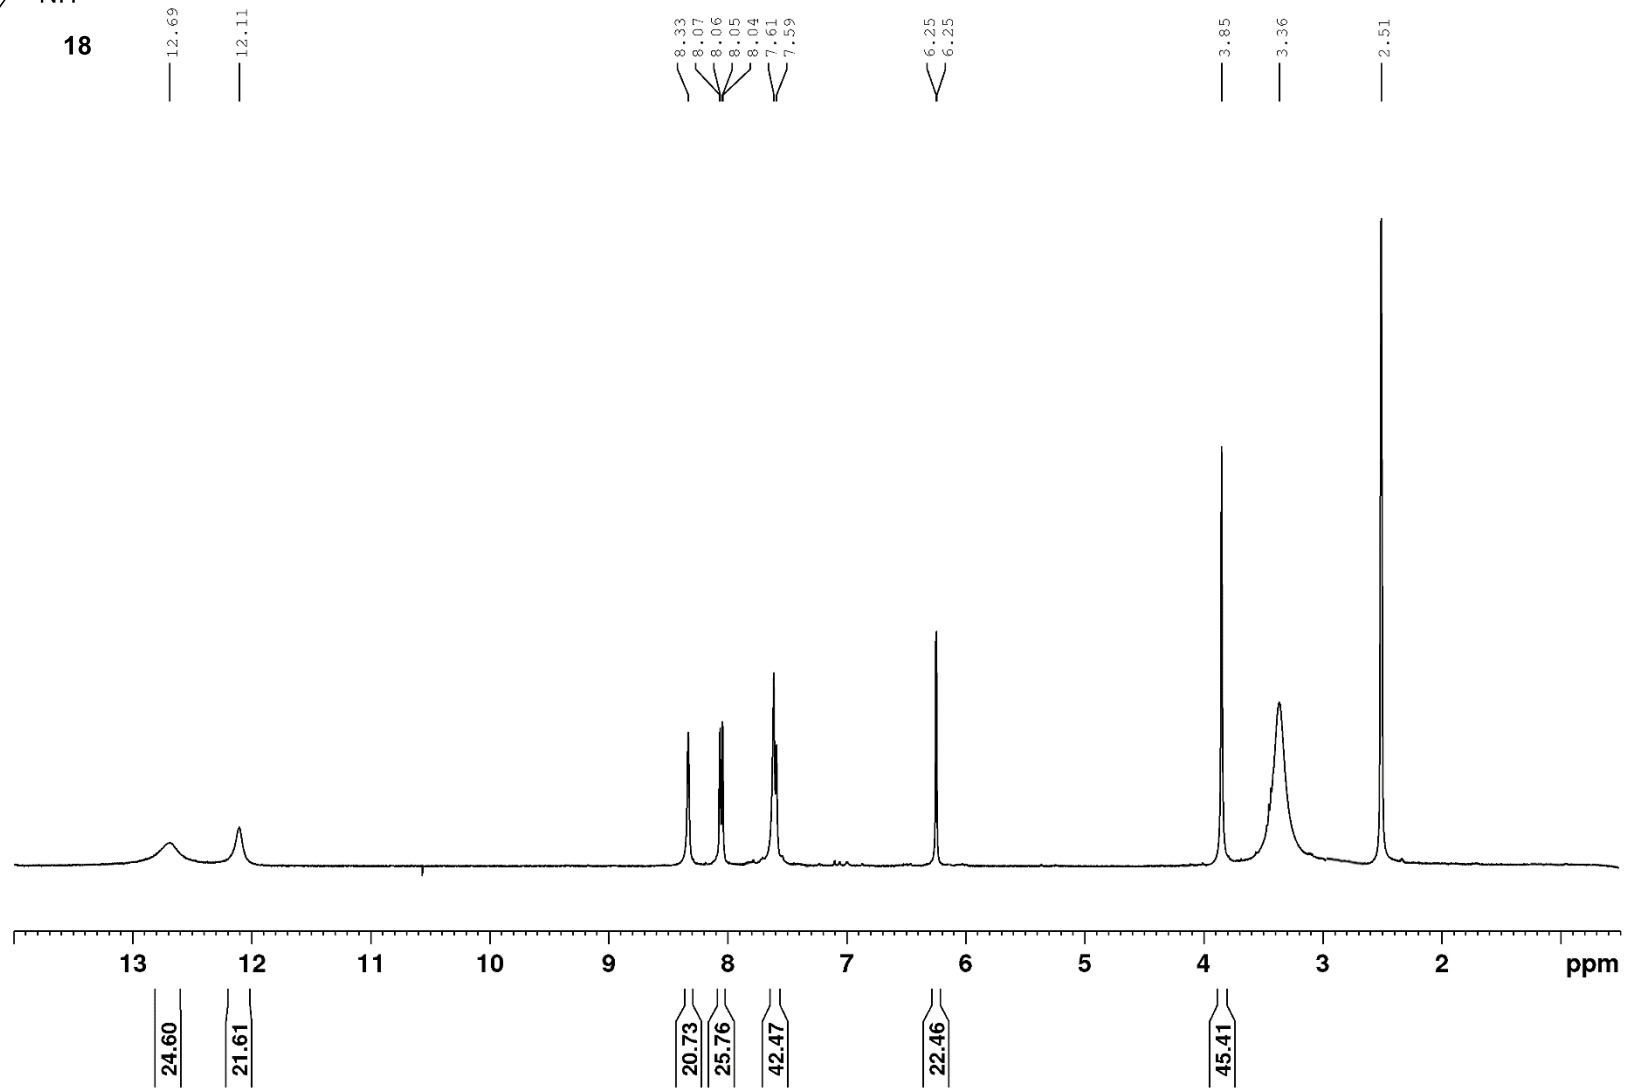

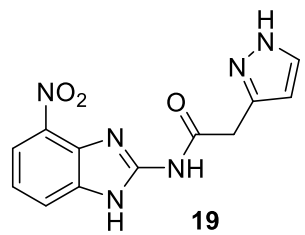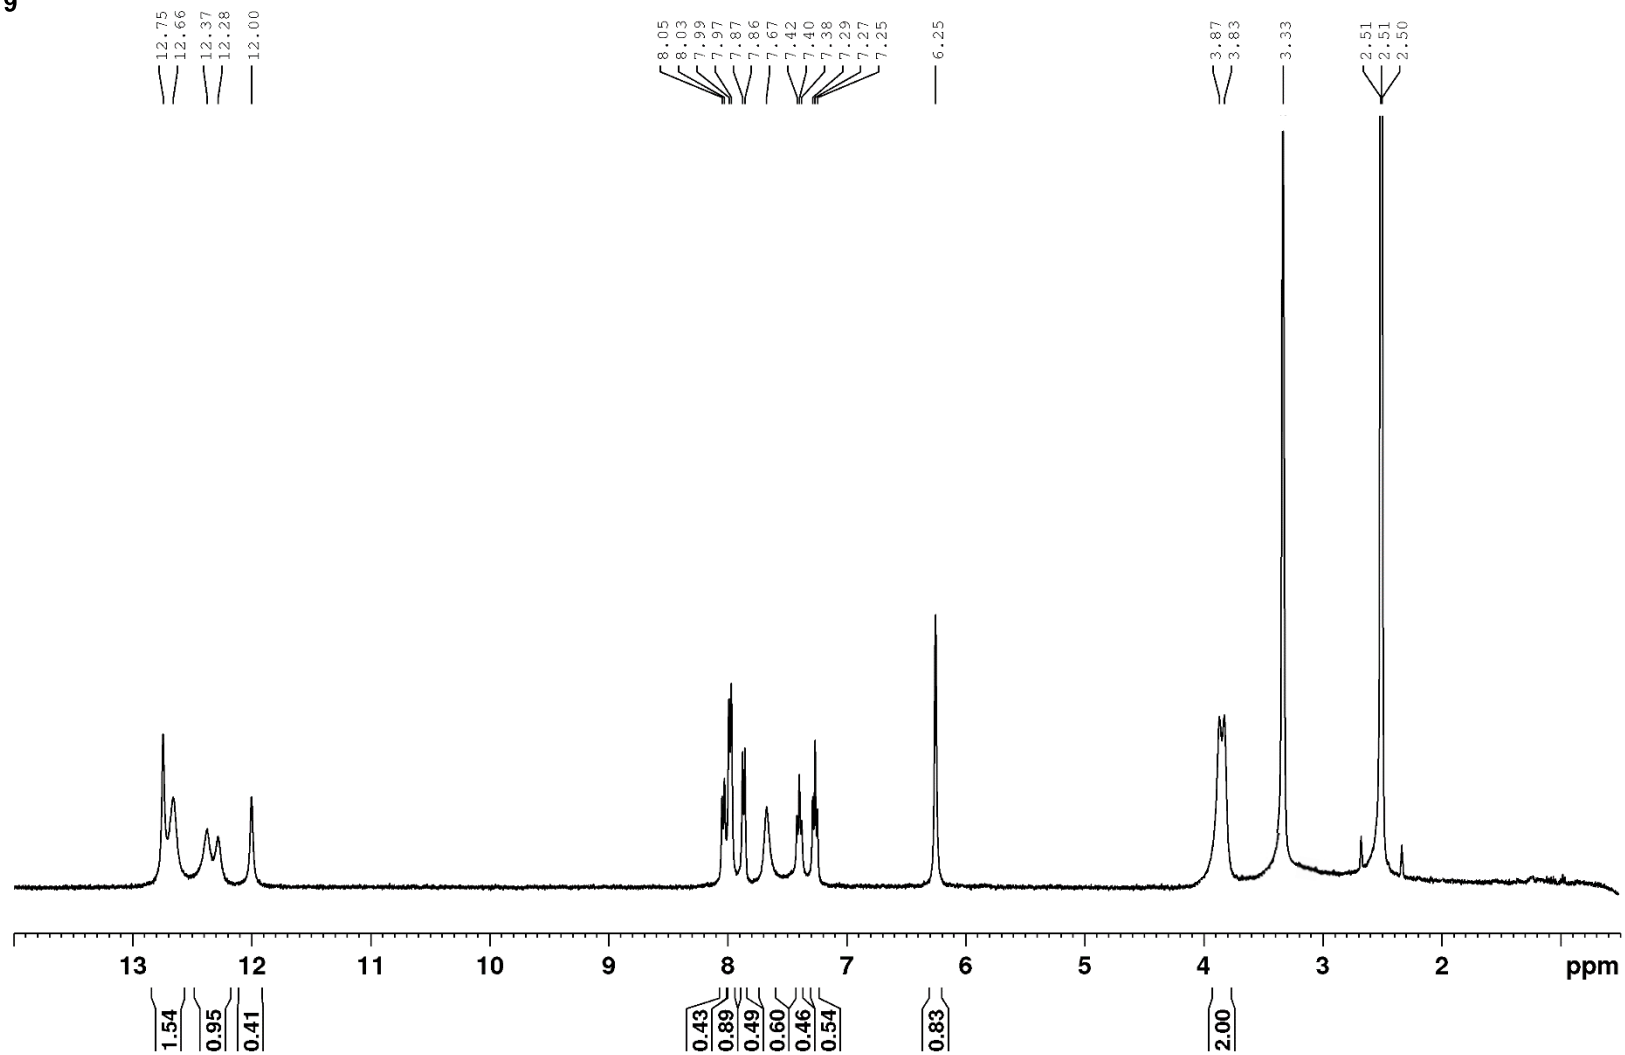

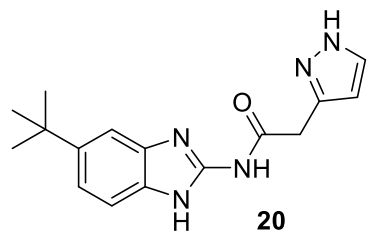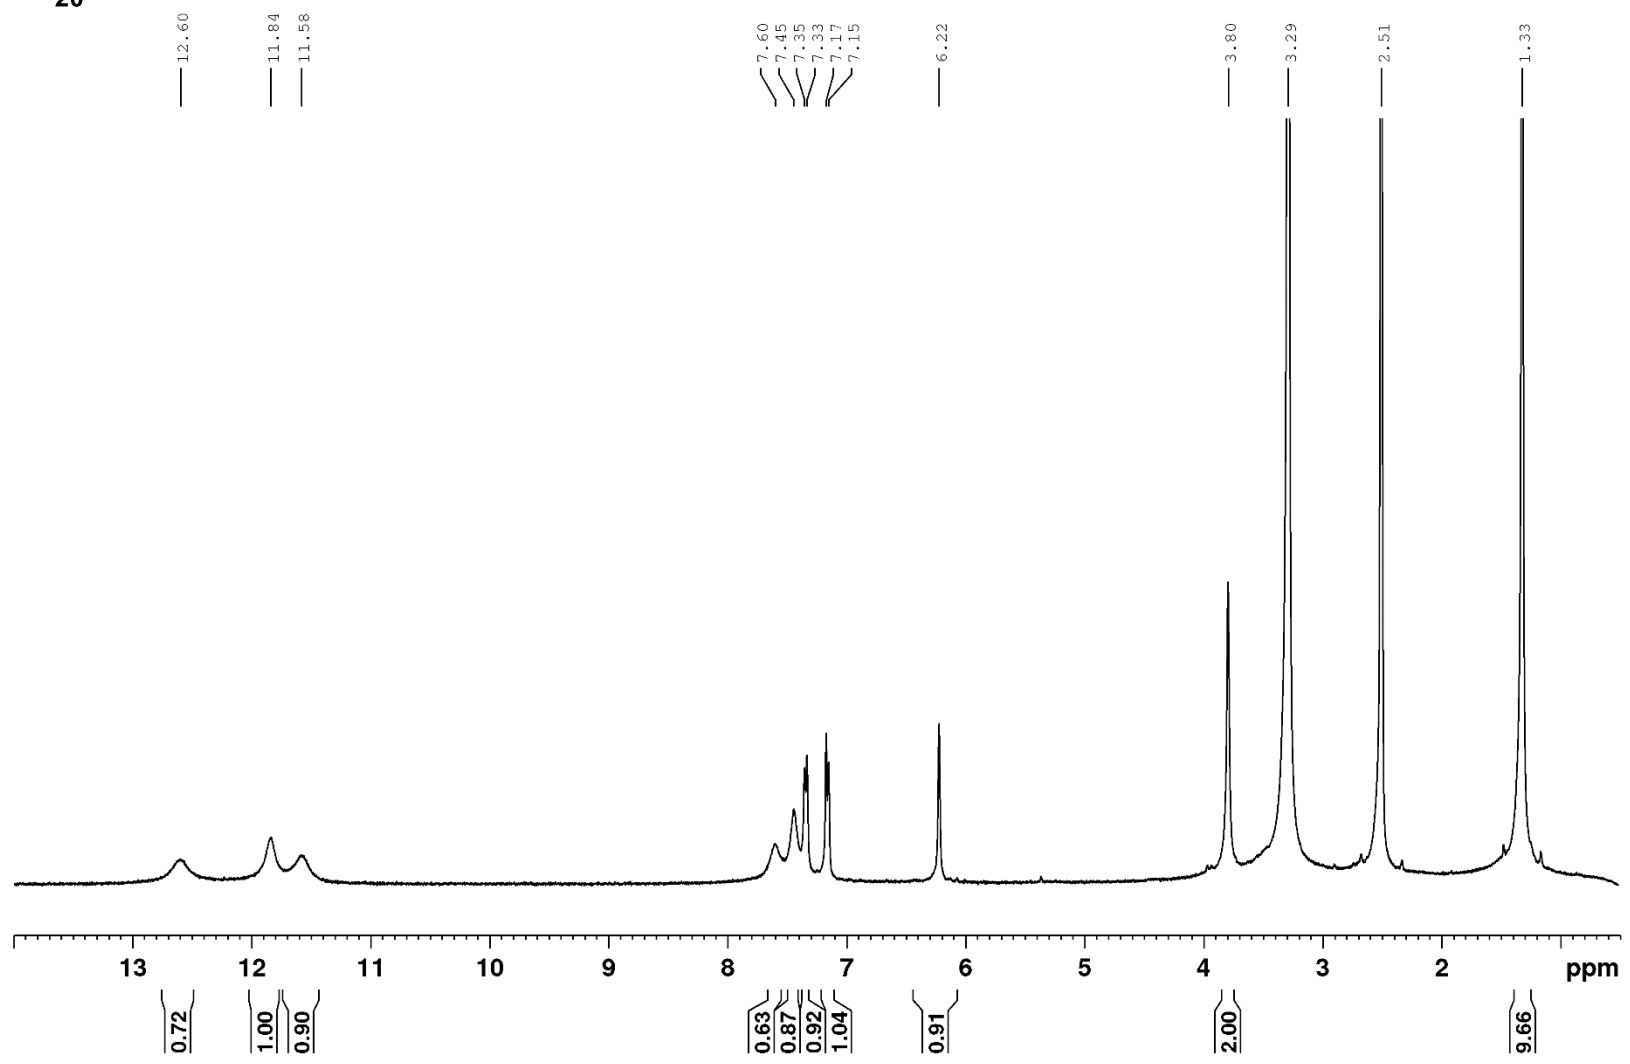

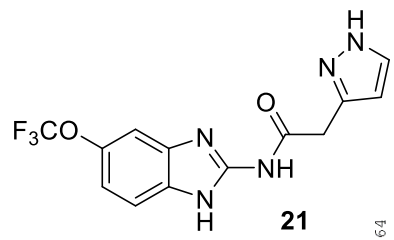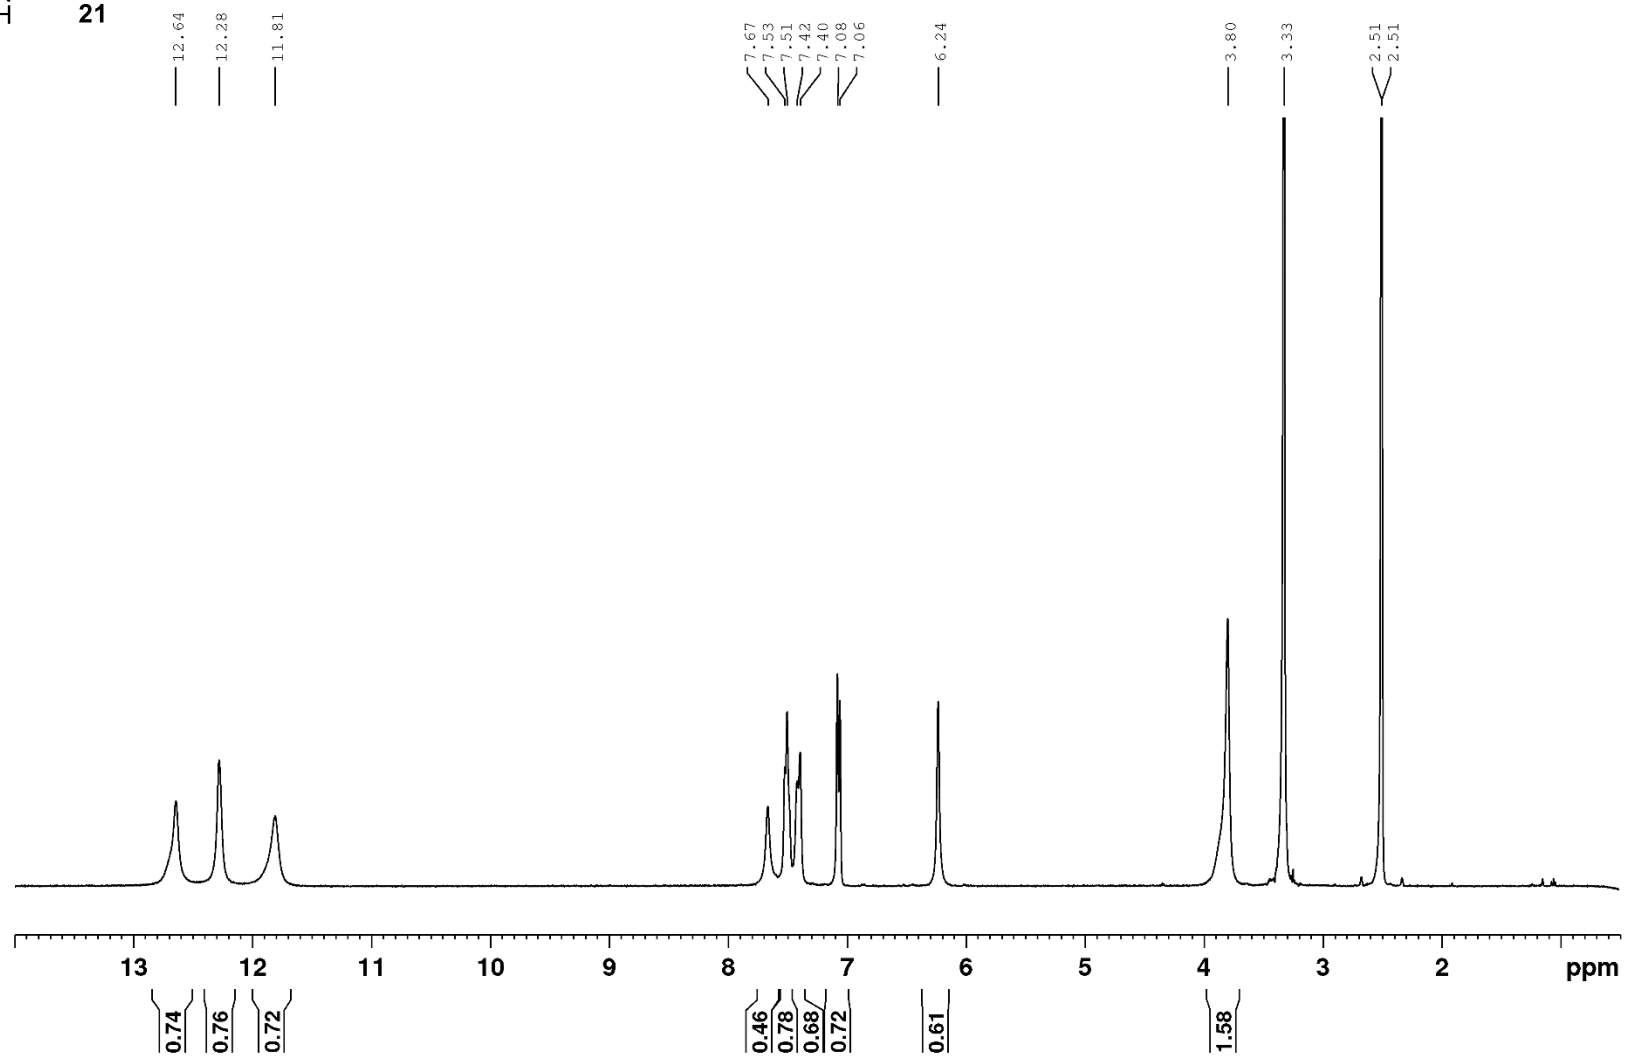



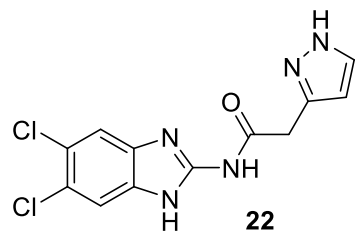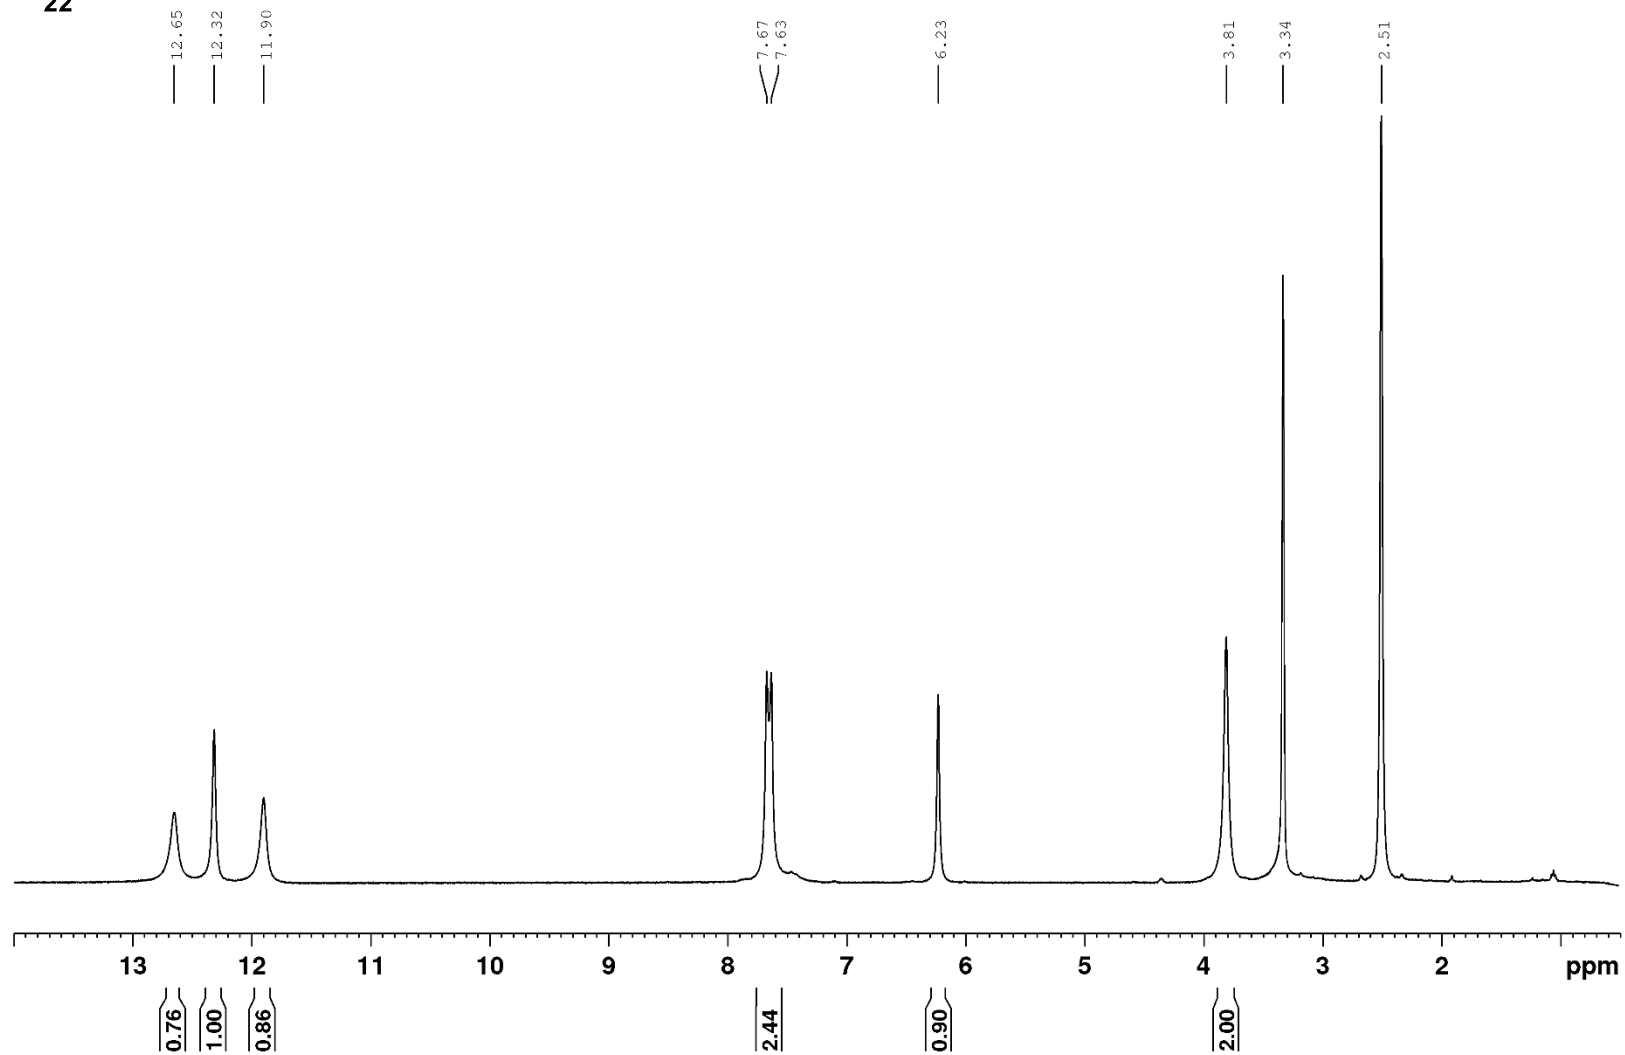

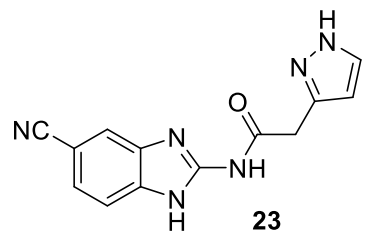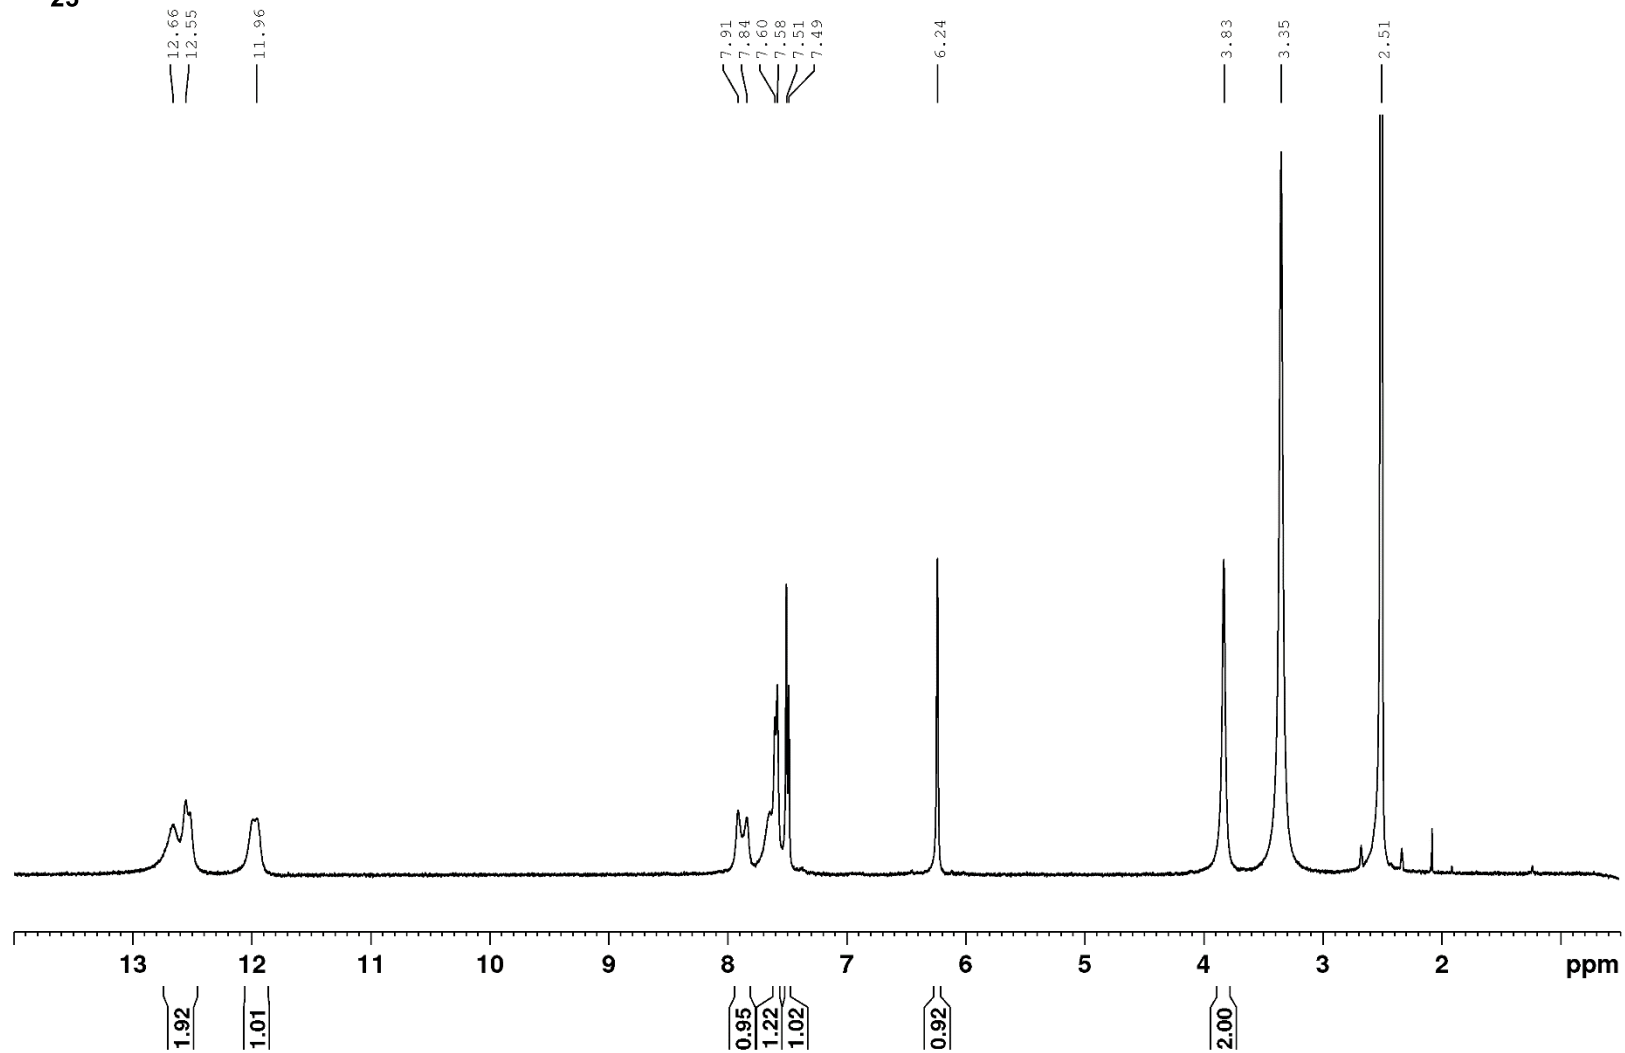

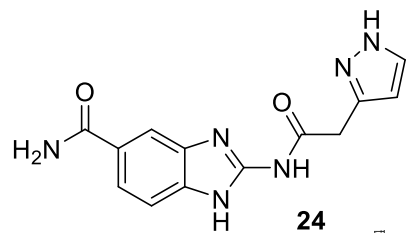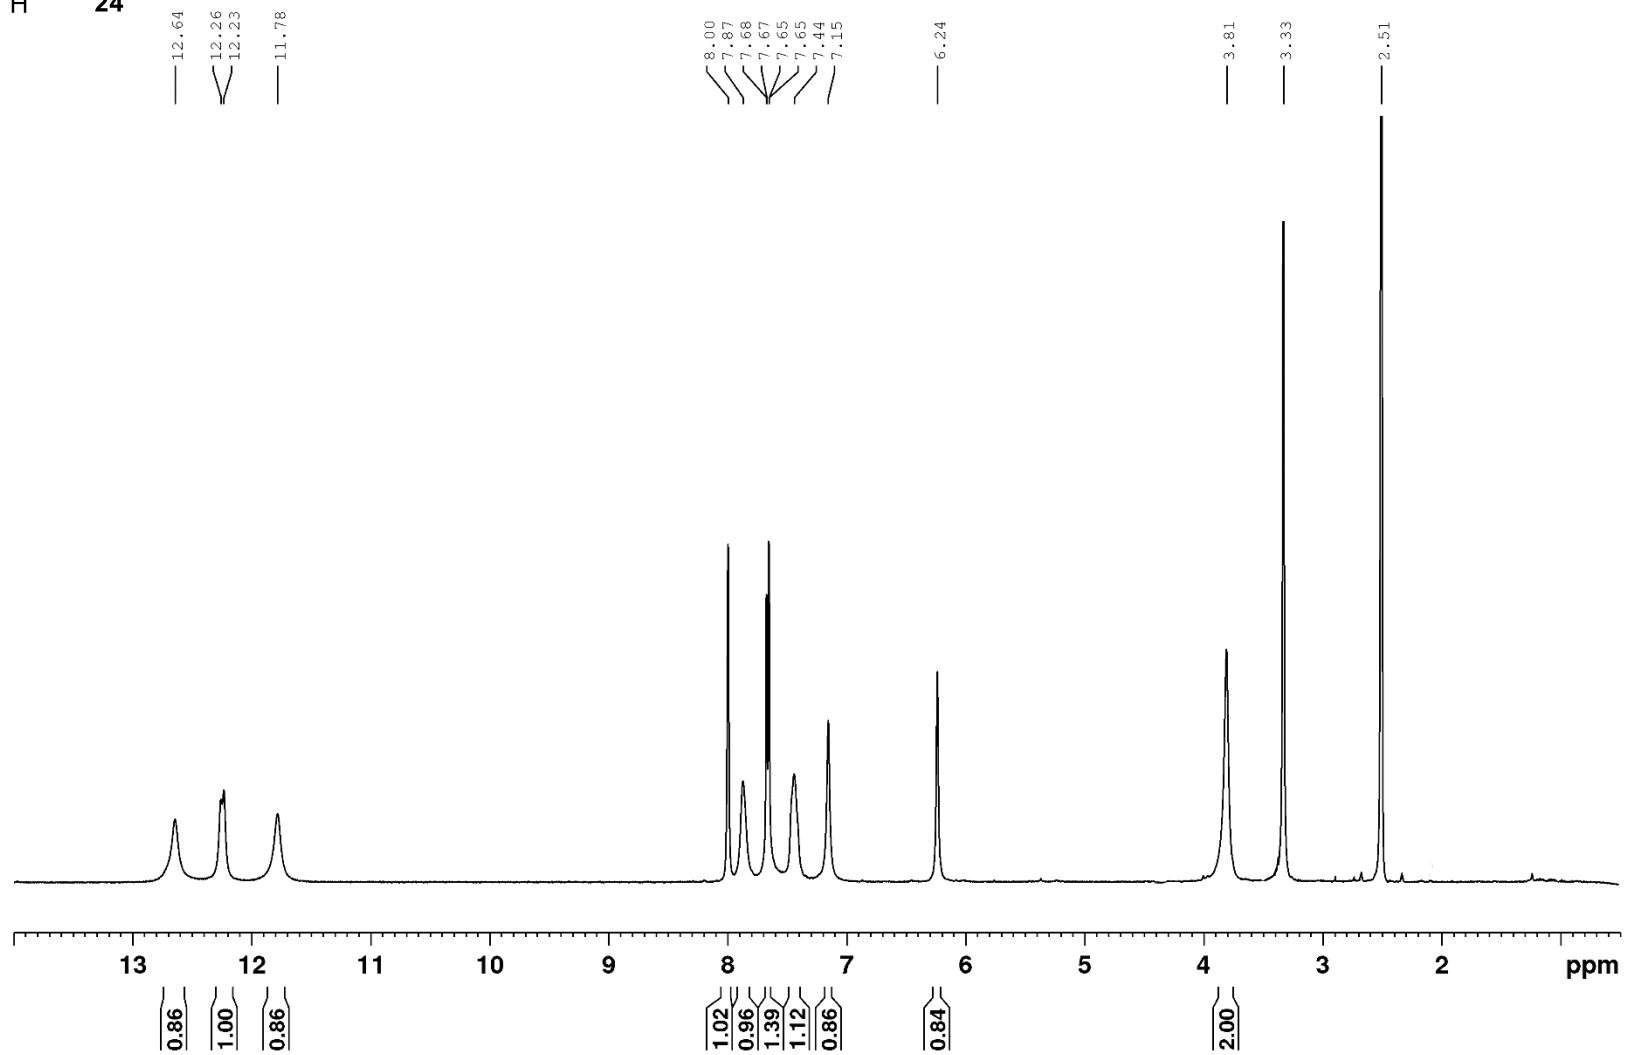

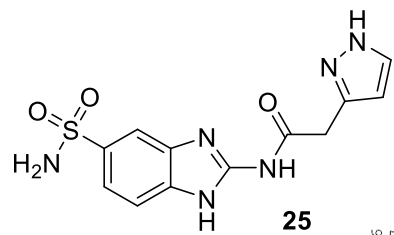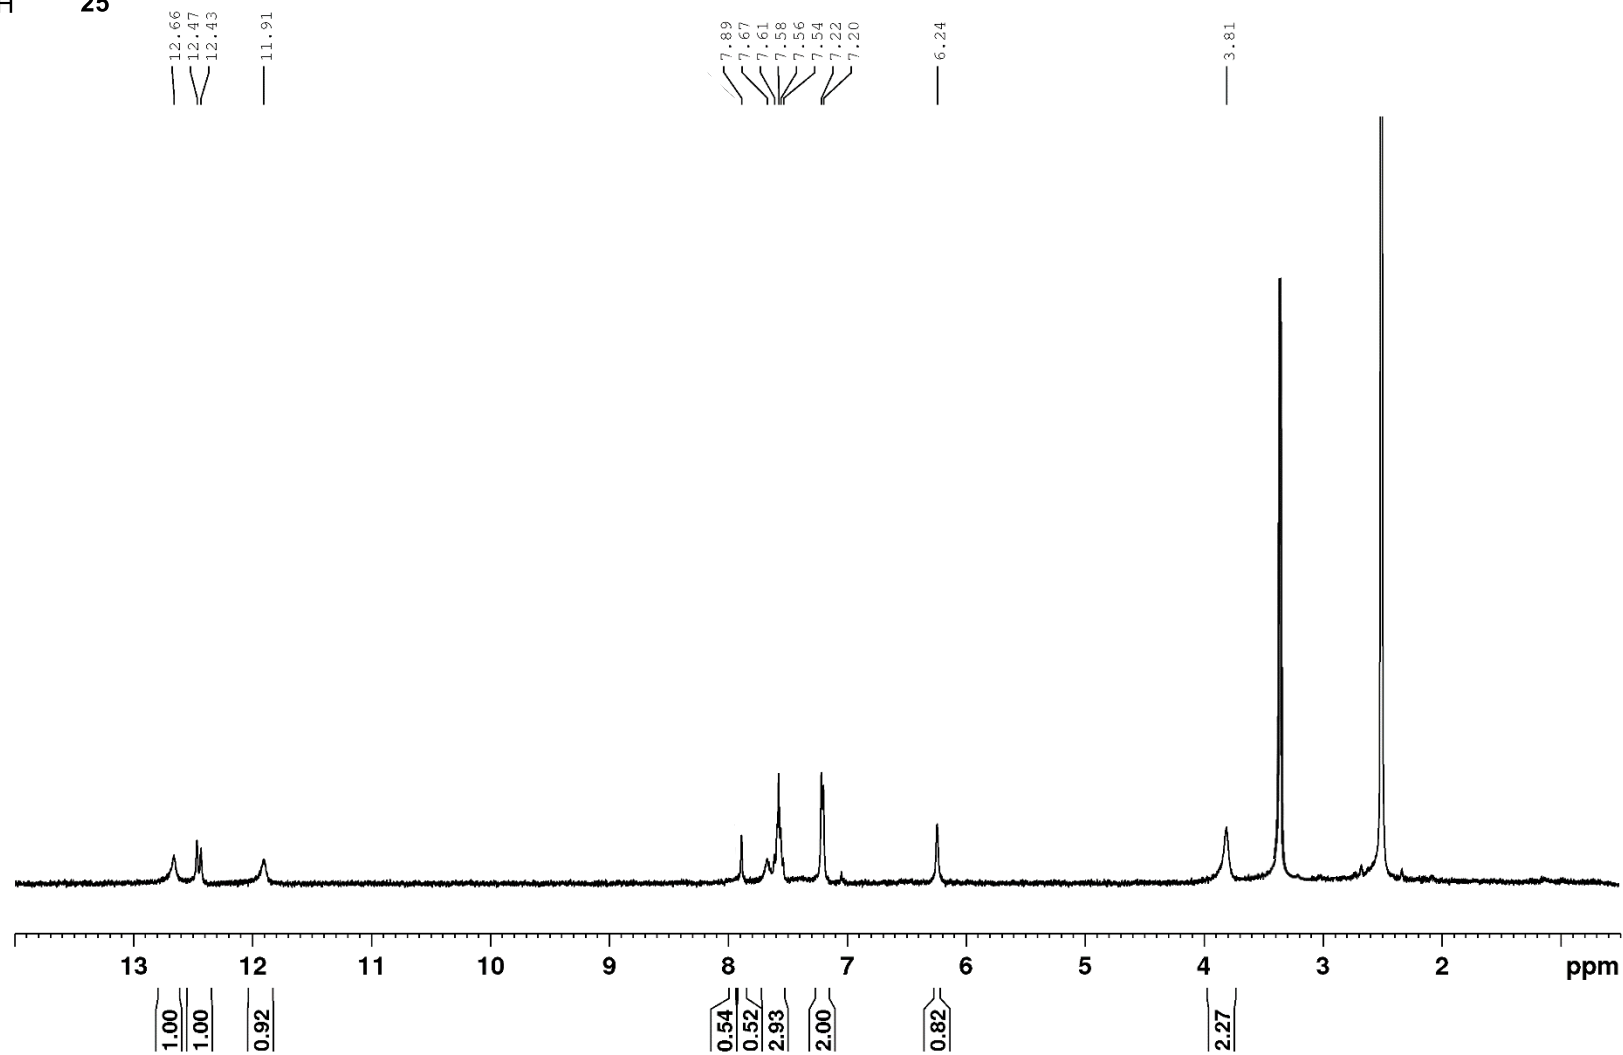

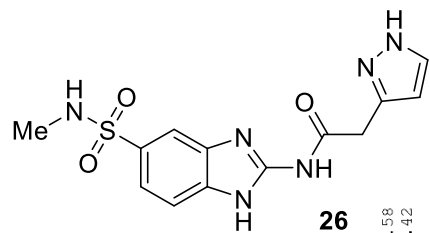

— 12.58  
— 12.42  
— 11.85

7.93  
7.83  
7.63  
7.61  
7.57  
7.54  
7.52  
7.20

— 6.24

— 3.84

2.40  
2.39

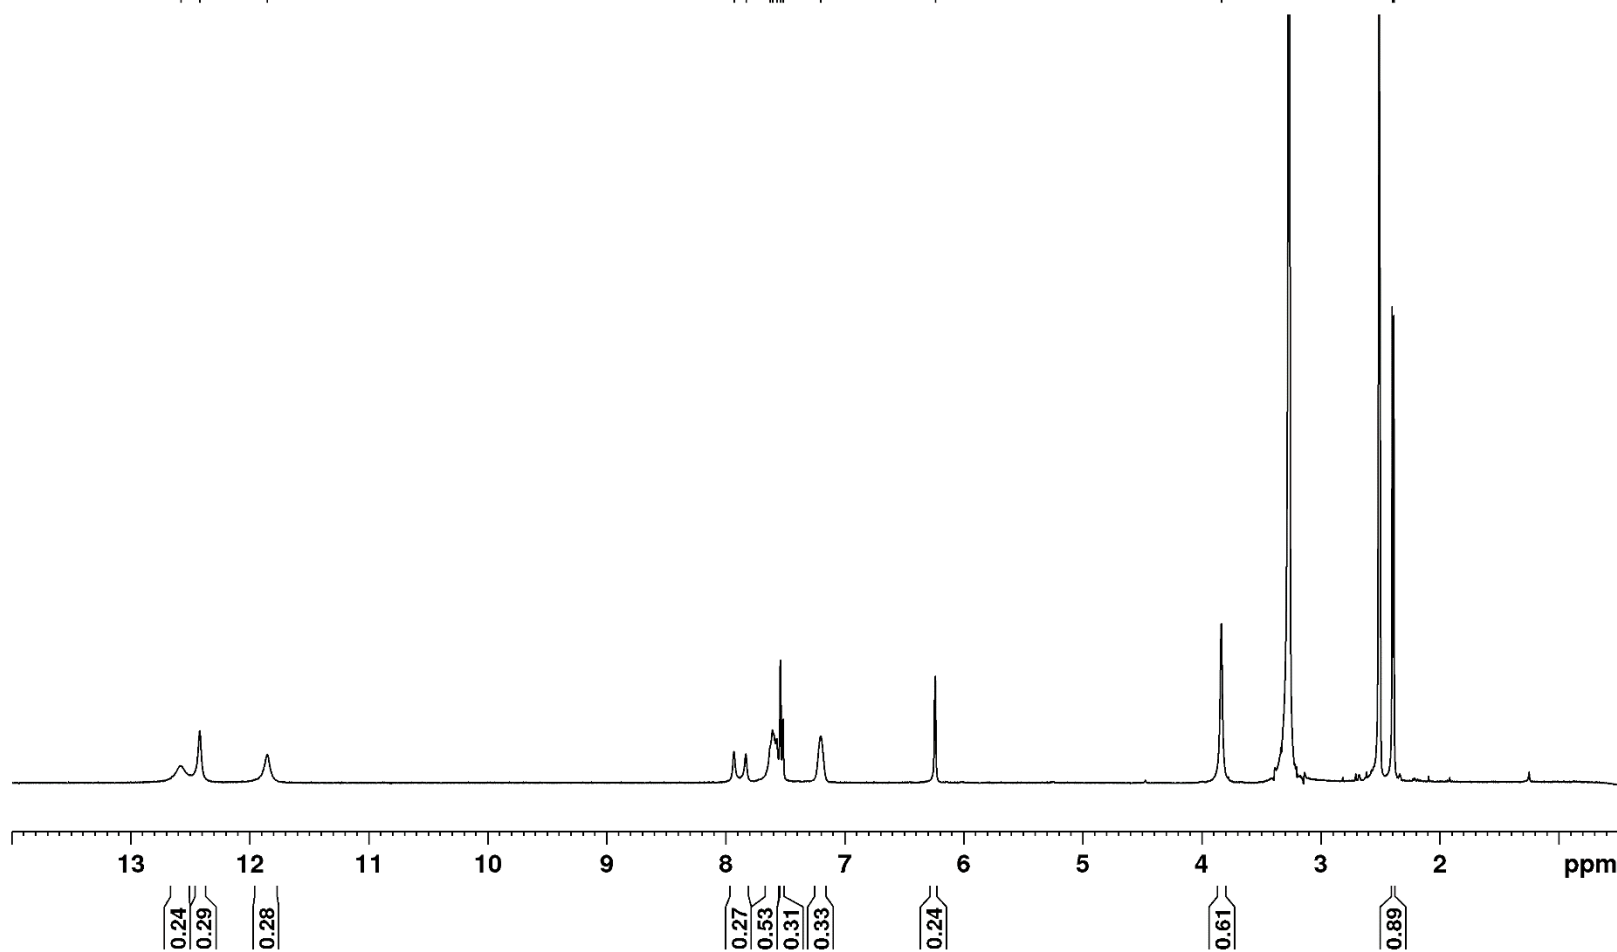

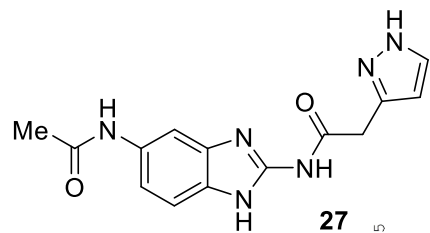

27

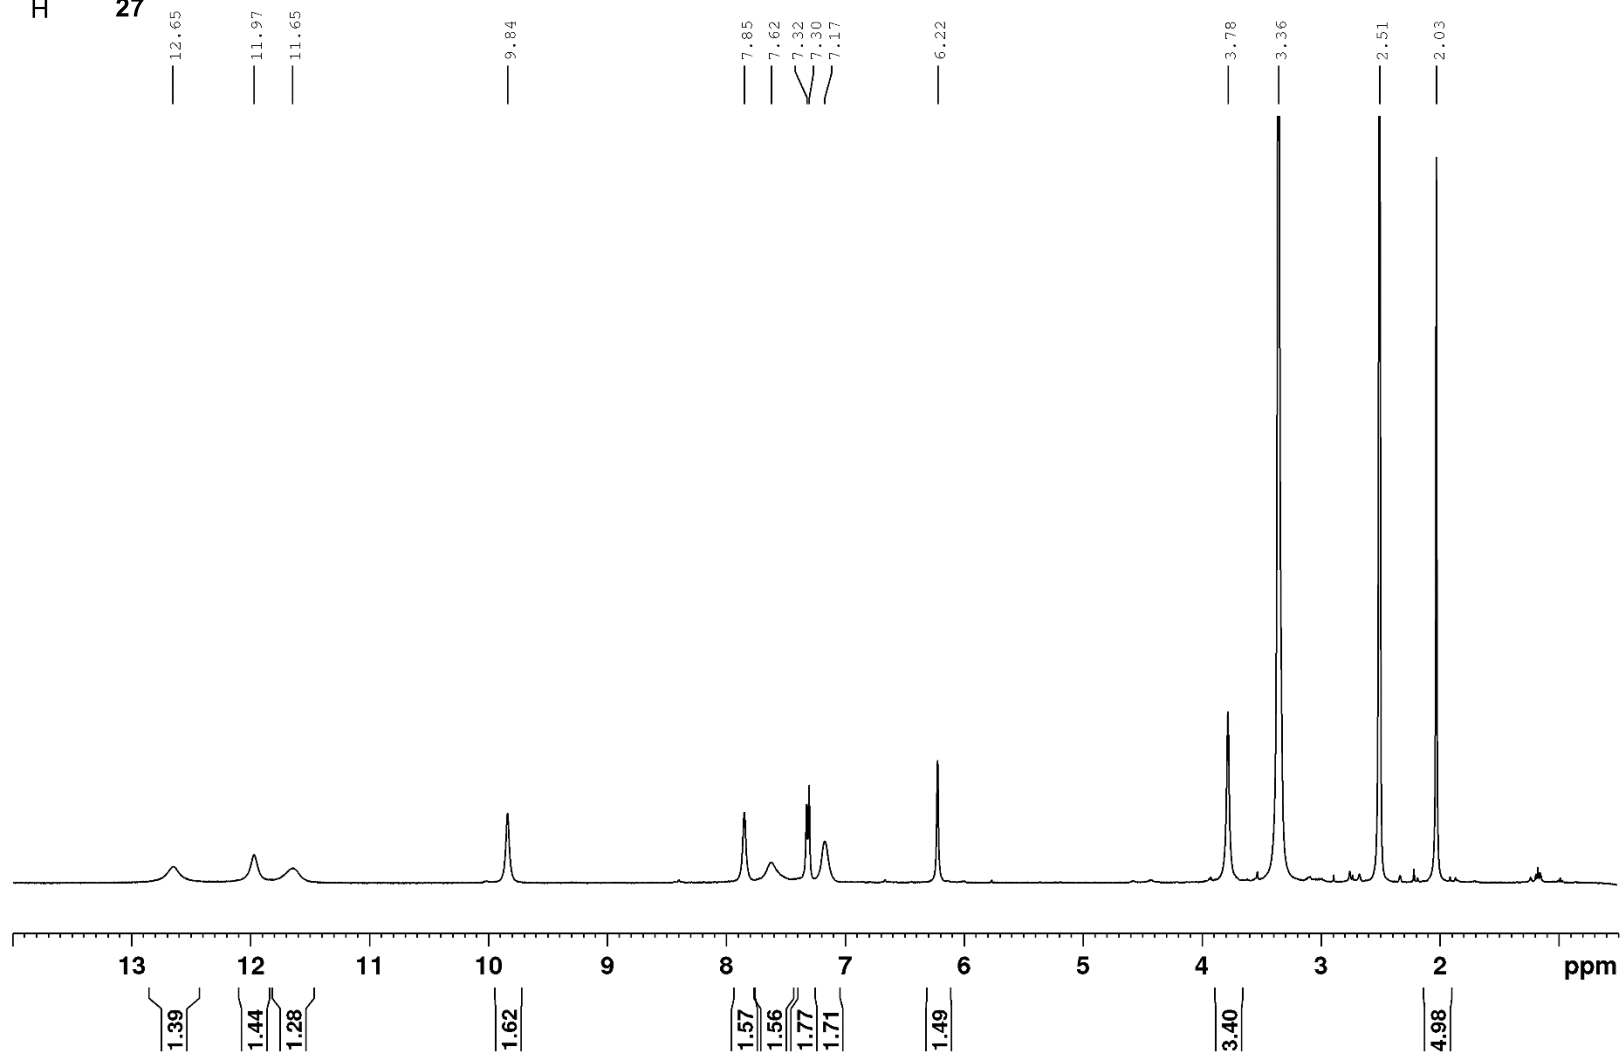

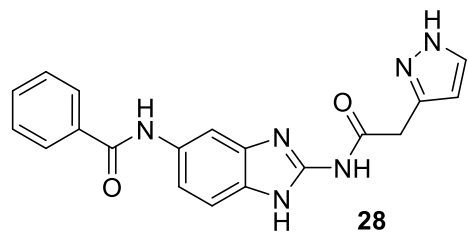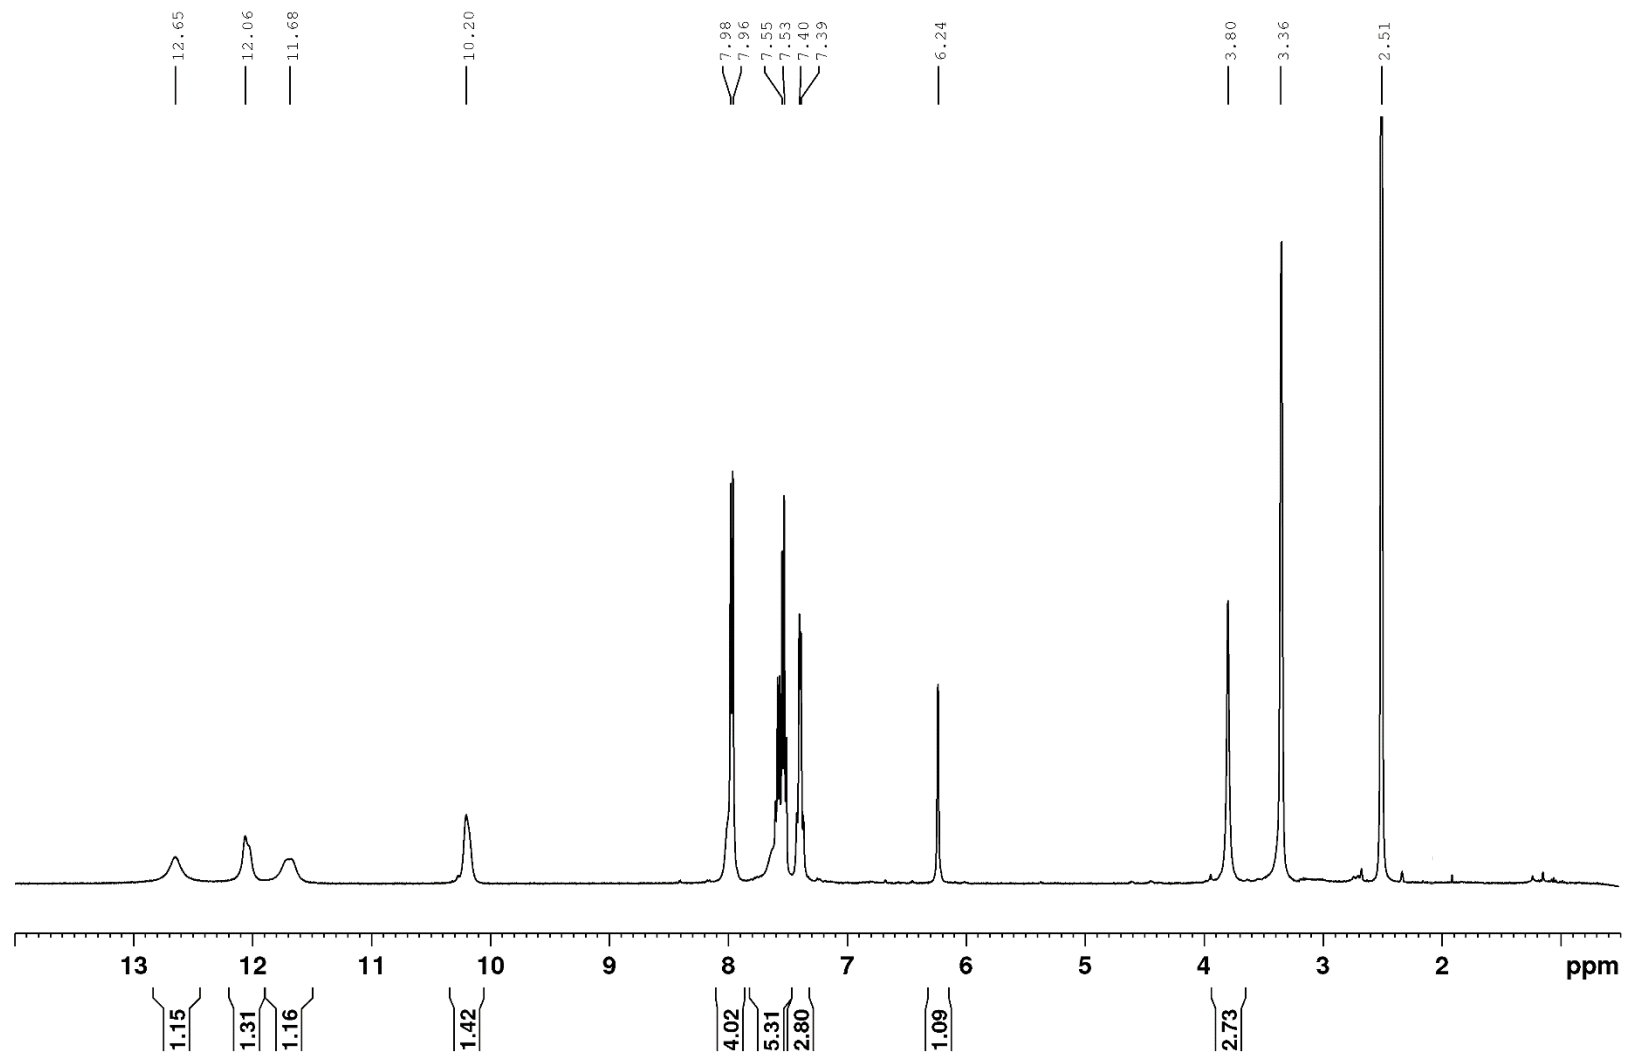

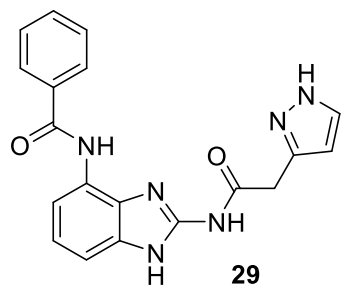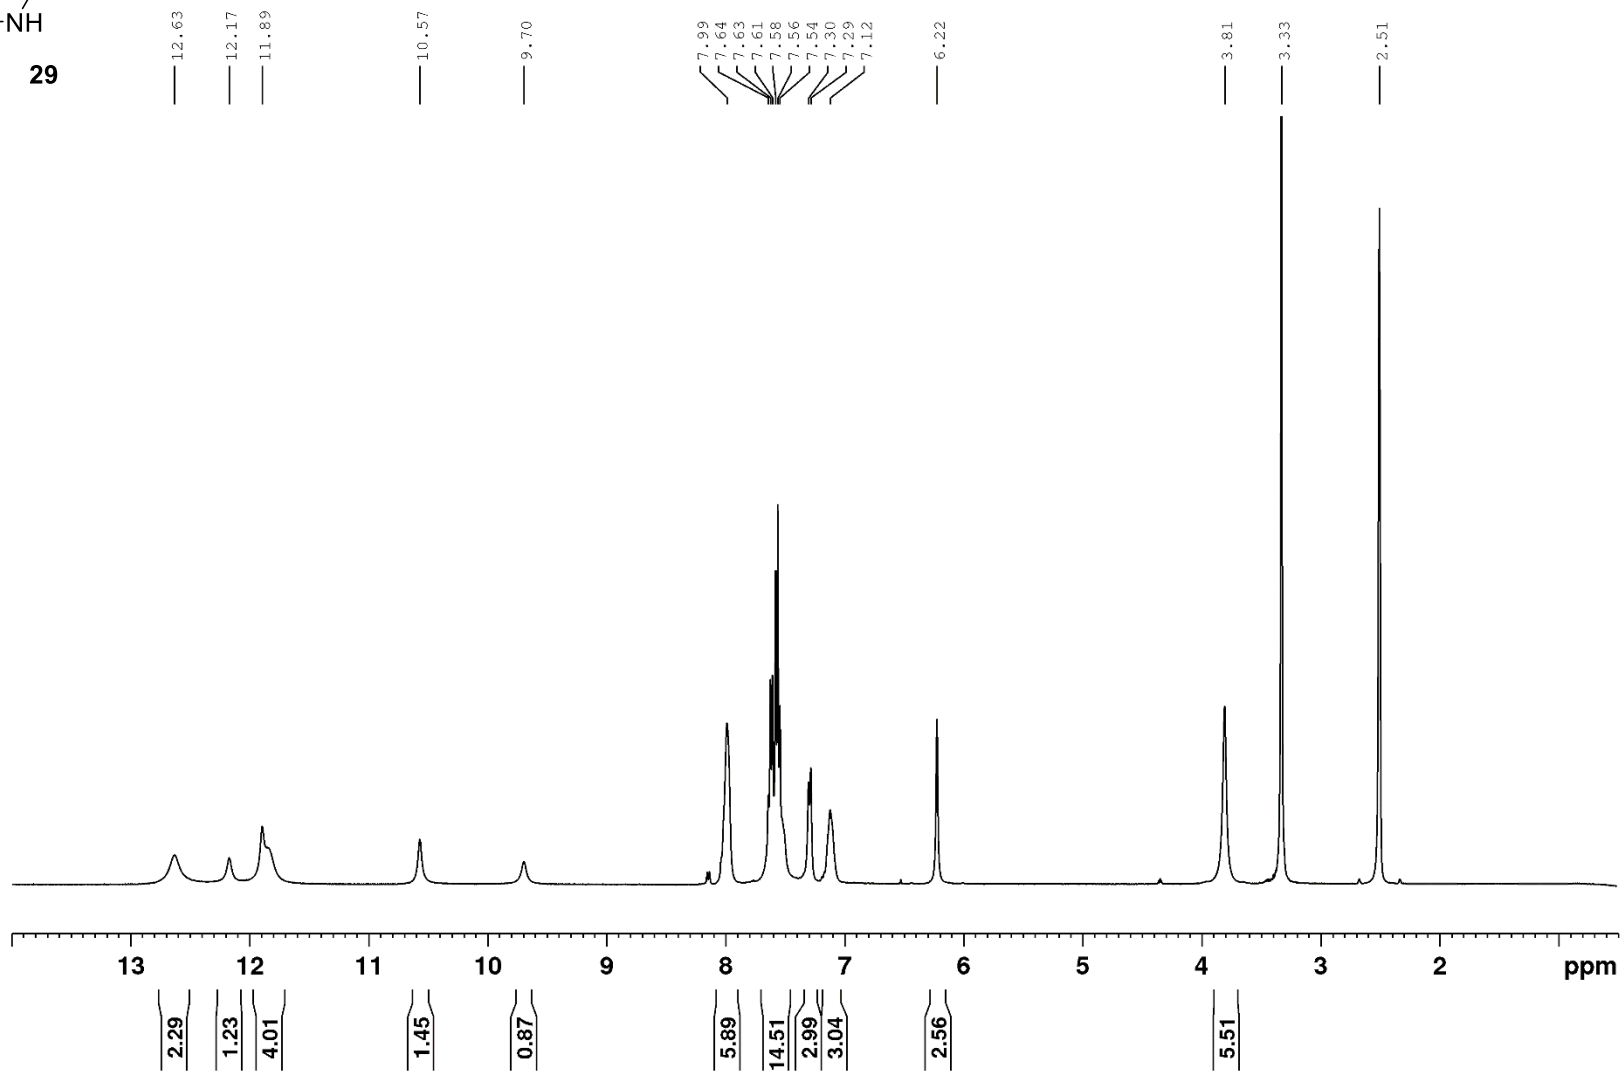



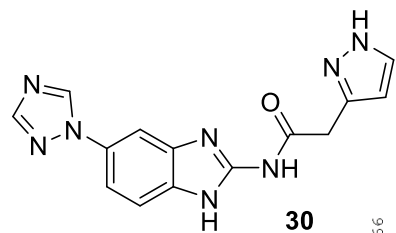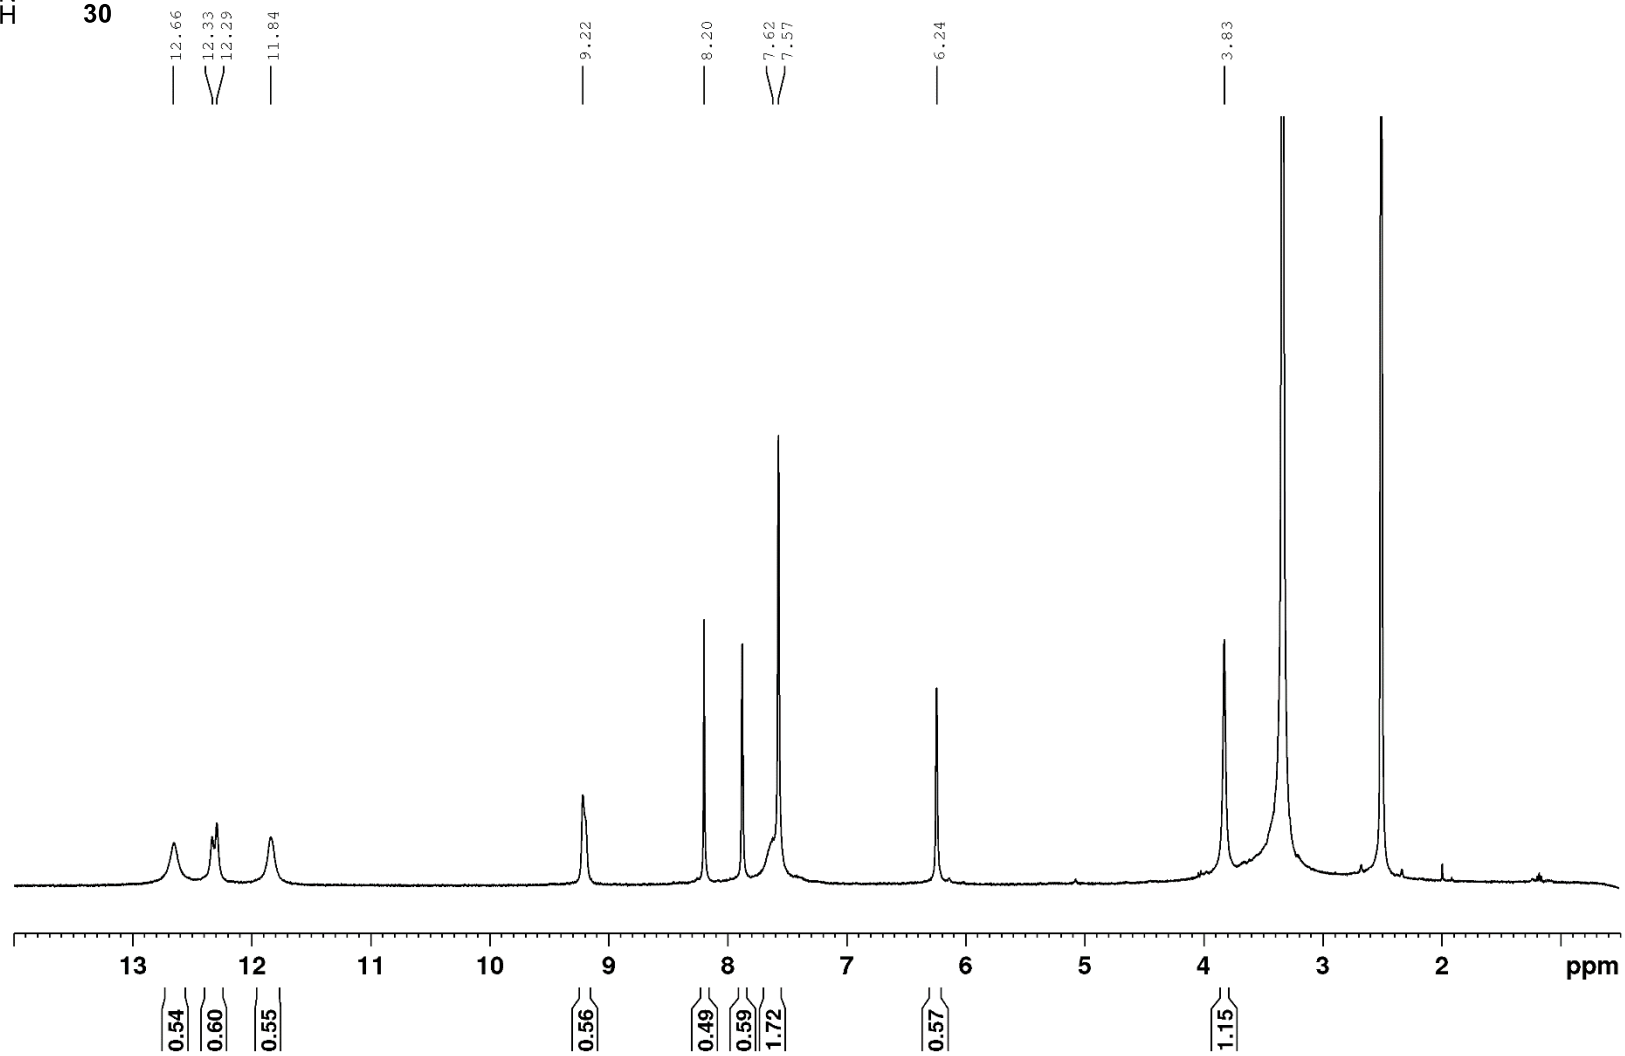

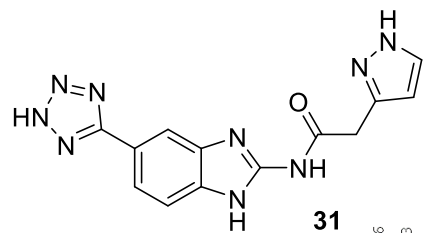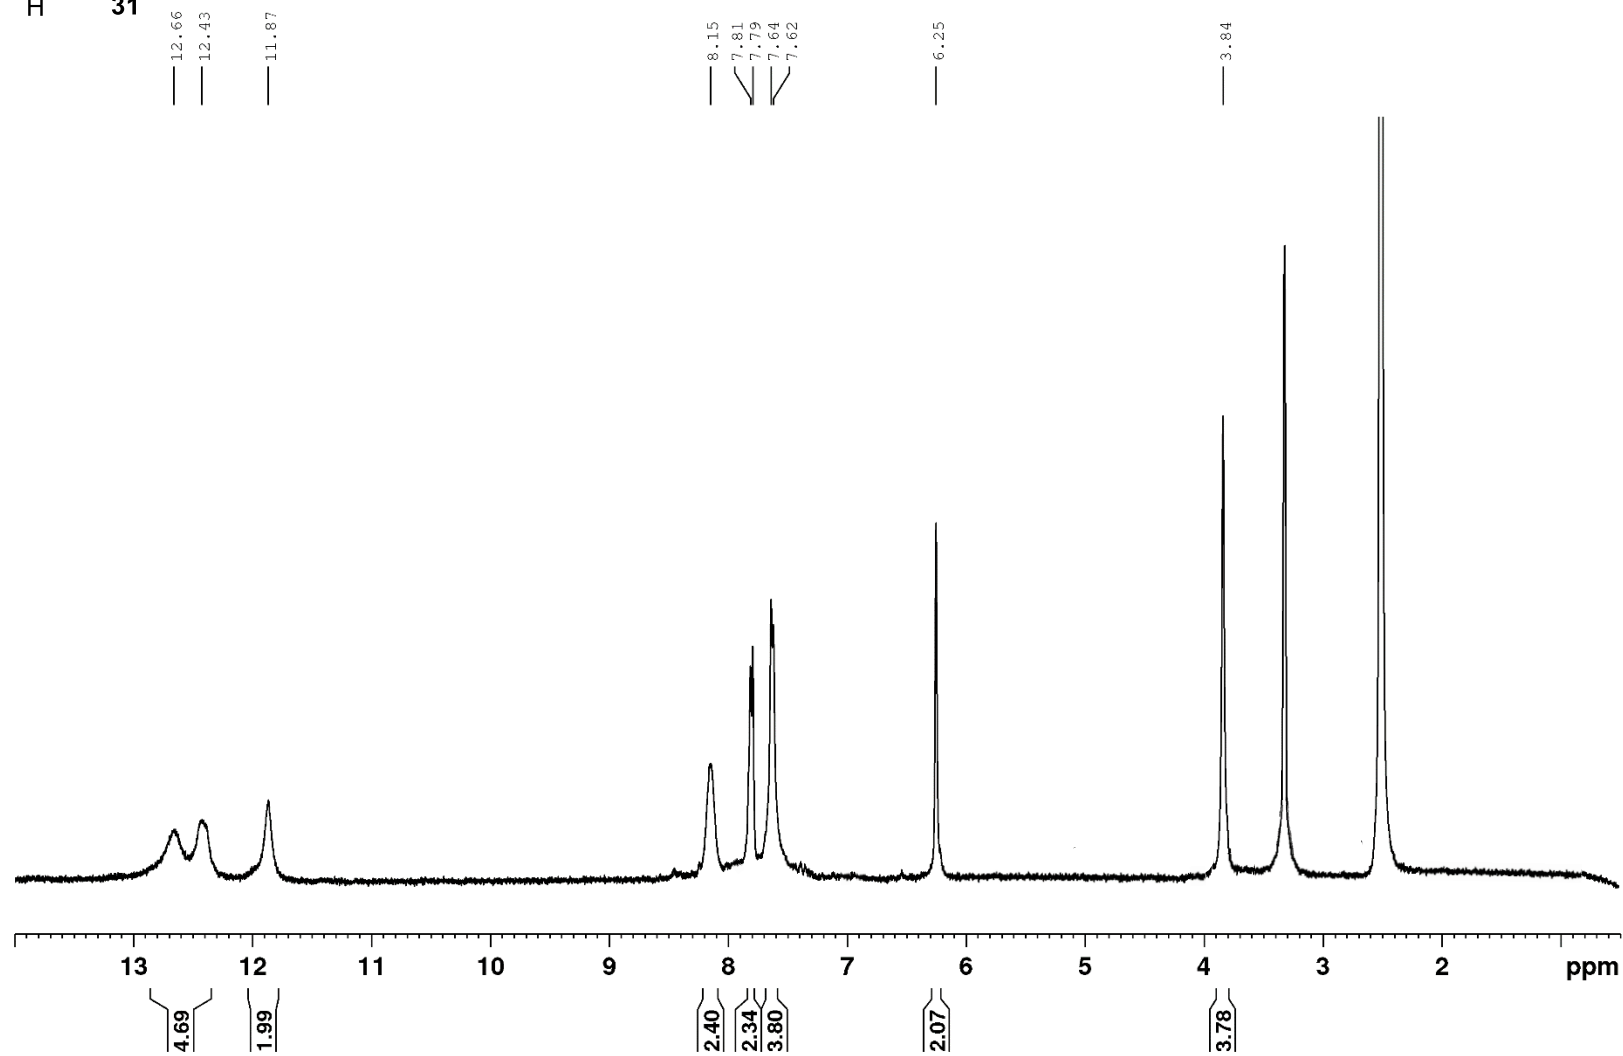

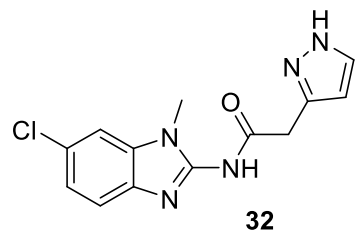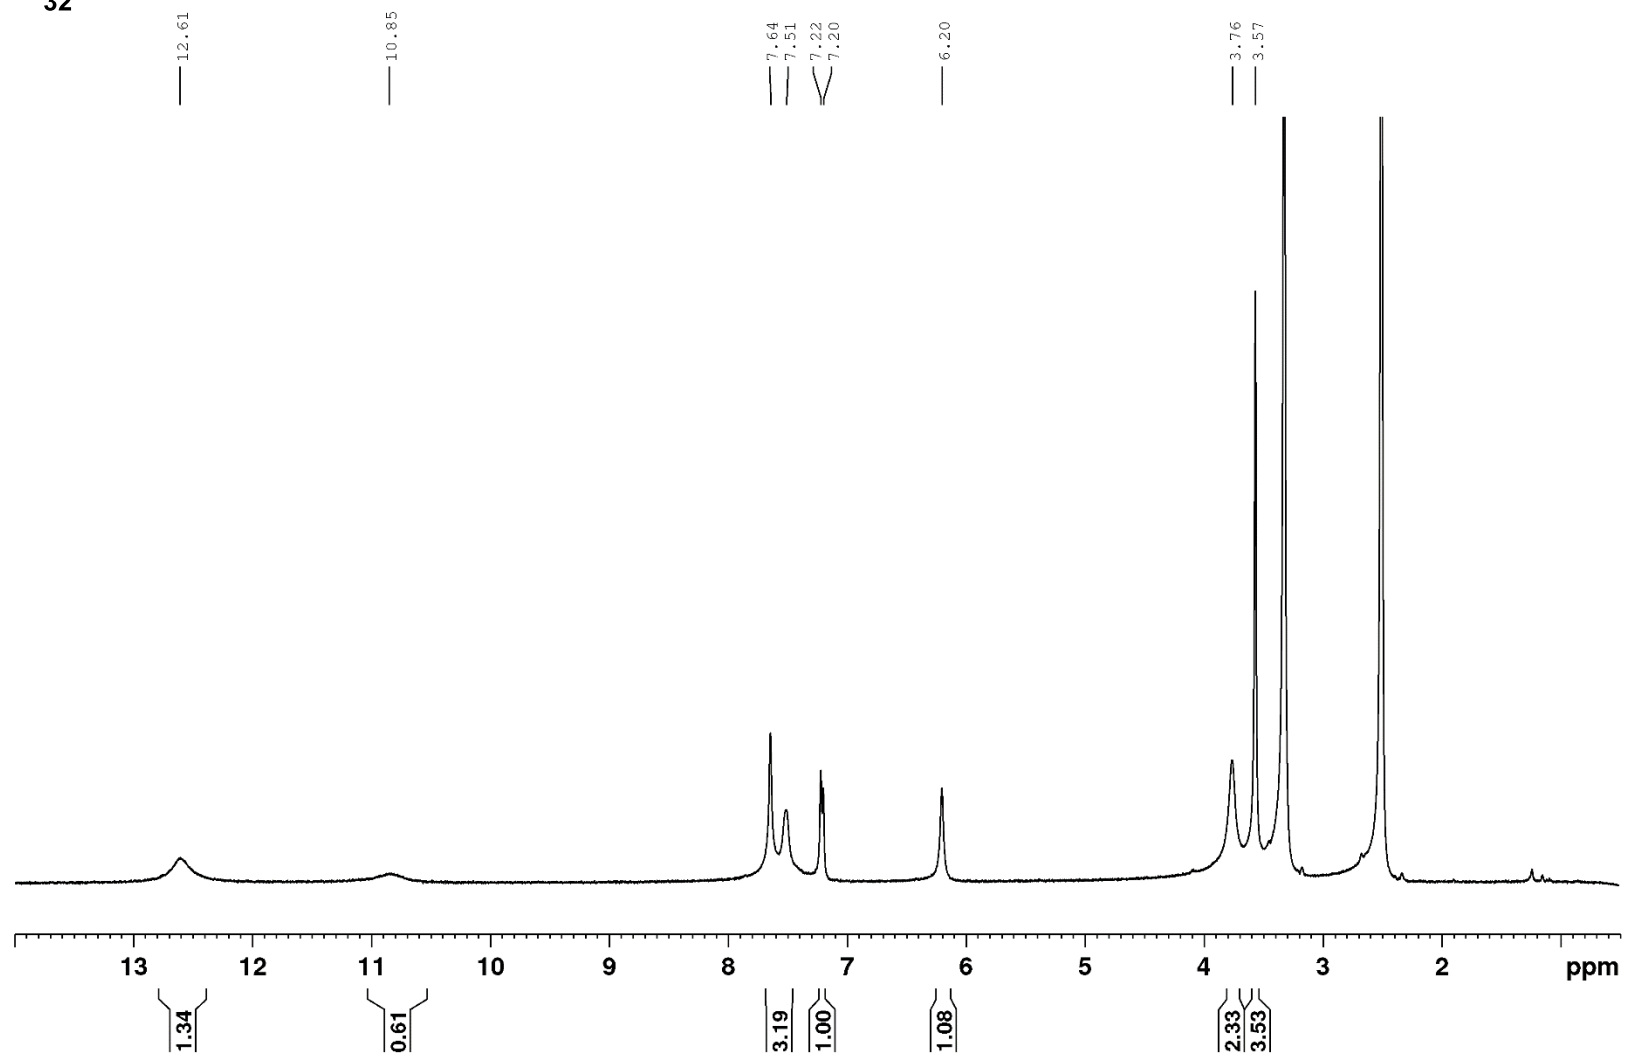

Supplement: s1 [file s1]
